# Supplementary material for: Gender differences in bodyweight change following COVID-19 lockdown measures in the Netherlands: a prospective longitudinal study
Source: PubMed Central journal article supplement — BMJ Open. 2022 Apr 26;12(4):e054658. doi: 10.1136/bmjopen-2021-054658 (PMC10098263; doi:10.1136/bmjopen-2021-054658), 2022-04-26
Supplement: bmjopen-2021-054658.draft_revisions.pdf [file bmjopen-2021-054658.draft_revisions.pdf]

# BMJ Open

BMJ Open is committed to open peer review. As part of this commitment we make the peer review history of every article we publish publicly available.

When an article is published we post the peer reviewers' comments and the authors' responses online. We also post the versions of the paper that were used during peer review. These are the versions that the peer review comments apply to.

The versions of the paper that follow are the versions that were submitted during the peer review process. They are not the versions of record or the final published versions. They should not be cited or distributed as the published version of this manuscript.

BMJ Open is an open access journal and the full, final, typeset and author-corrected version of record of the manuscript is available on our site with no access controls, subscription charges or pay-per-view fees (<http://bmjopen.bmj.com>).

If you have any questions on BMJ Open's open peer review process please email [info.bmjopen@bmj.com](mailto:info.bmjopen@bmj.com)

# BMJ Open

## Gender differences in bodyweight change following COVID-19 lockdown measures in the Netherlands. A prospective study

|                               |                                                                                                                          |
|-------------------------------|--------------------------------------------------------------------------------------------------------------------------|
| Journal:                      | <i>BMJ Open</i>                                                                                                          |
| Manuscript ID                 | bmjopen-2021-054658                                                                                                      |
| Article Type:                 | Original research                                                                                                        |
| Date Submitted by the Author: | 18-Jun-2021                                                                                                              |
| Complete List of Authors:     | van den Broek, Thijs; Erasmus University Rotterdam<br>Fleischmann, Maria ; Vrije Universiteit Amsterdam, Health Sciences |
| Keywords:                     | COVID-19, EPIDEMIOLOGY, PUBLIC HEALTH, SOCIAL MEDICINE                                                                   |
|                               |                                                                                                                          |

SCHOLARONE™  
Manuscripts

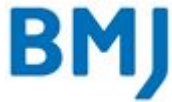

I, the Submitting Author has the right to grant and does grant on behalf of all authors of the Work (as defined in the below author licence), an exclusive licence and/or a non-exclusive licence for contributions from authors who are: i) UK Crown employees; ii) where BMJ has agreed a CC-BY licence shall apply, and/or iii) in accordance with the terms applicable for US Federal Government officers or employees acting as part of their official duties; on a worldwide, perpetual, irrevocable, royalty-free basis to BMJ Publishing Group Ltd ("BMJ") its licensees and where the relevant Journal is co-owned by BMJ to the co-owners of the Journal, to publish the Work in this journal and any other BMJ products and to exploit all rights, as set out in our [licence](#).

The Submitting Author accepts and understands that any supply made under these terms is made by BMJ to the Submitting Author unless you are acting as an employee on behalf of your employer or a postgraduate student of an affiliated institution which is paying any applicable article publishing charge ("APC") for Open Access articles. Where the Submitting Author wishes to make the Work available on an Open Access basis (and intends to pay the relevant APC), the terms of reuse of such Open Access shall be governed by a Creative Commons licence – details of these licences and which [Creative Commons](#) licence will apply to this Work are set out in our licence referred to above.

Other than as permitted in any relevant BMJ Author's Self Archiving Policies, I confirm this Work has not been accepted for publication elsewhere, is not being considered for publication elsewhere and does not duplicate material already published. I confirm all authors consent to publication of this Work and authorise the granting of this licence.

1  
2  
3  
4  
5  
6  
7  
8  
9  
10  
11  
12  
13  
14  
15  
16  
17  
18  
19  
20  
21  
22  
23  
24  
25  
26  
27  
28  
29  
30  
31  
32  
33  
34  
35  
36  
37  
38  
39  
40  
41  
42  
43  
44  
45  
46  
47  
48  
49  
50  
51  
52  
53  
54  
55  
56  
57  
58  
59  
60

# Gender differences in bodyweight change following COVID-19 lockdown measures in the Netherlands A prospective study

Thijs van den Broek\*<sup>1</sup> & Maria Fleischmann<sup>2</sup>

<sup>1</sup> Erasmus School of Health Policy & Management, Erasmus University Rotterdam, Postbus 1738, 3000 DR Rotterdam, The Netherlands, +31 10 408 85 77, vandenbroek@eshpm.eur.nl

\*corresponding author

<sup>2</sup> Department of Health Sciences, Vrije Universiteit Amsterdam, Amsterdam, The Netherlands

**Keywords:** health behaviour; gender; longitudinal analysis; overweight; body mass index

**Word count (main text only):** 2,197

## Abstract

*Background:* The current study aimed to prospectively assess bodyweight change following the implementation of lockdown measures to contain the COVID-19 pandemic in the Netherlands, and to explore the potentially moderating role of gender in this association. Results of prior work on the links between lockdown measures and bodyweight change should be interpreted with caution, because this work was typically cross-sectional or retrospective, mostly used non-probability samples, and tended to overlook potential gender differences in the bodyweight implications of lockdown measures.

*Design:* Using Dutch DNB Household Survey panel data collected between 1993 and 2020, we estimated fixed-effects regression models of bodyweight change. Models were stratified by gender and formal tests of gender differences in coefficient estimates were performed.

*Participants:* 4,365 women and 4,583 men aged 18-65 were included in the study. The total number of observations was 41,330.

*Outcome measures:* Self-reported bodyweight in kilograms. Additional analyses were performed using body mass index as the outcome.

*Results:* The implementation of Dutch lockdown measures in 2020 was associated with bodyweight gain of approximately 800 grams in working age women compared to the three prior years. Bodyweight gain in 2020 relative to prior years was significantly stronger for women than for men significant ( $F(4, 8947)=3.9, p < .01$ ). No evidence of bodyweight gain in working age men was found.

*Conclusion:* Results indicate that bodyweight gain following COVID-19 lockdown measures in the Netherlands was more pronounced among women than among men. Although necessary to contain the COVID-19 pandemic, lockdown measures may contribute to a different public health challenge in the rising prevalence of overweight and obesity.

## Strengths and limitations of this study

- In contrast to most prior work, the current study uses a prospective approach and data from a random national sample to assess bodyweight change following the implementation of lockdown measures to contain the COVID-19 pandemic among Dutch men and women.
- The current study acknowledges that the bodyweight implications of lockdown measures may differ between men and women by estimating models stratified by gender and performing formal tests of gender differences in coefficient estimates.
- A limitation of the current study is that the measure of bodyweight is self-reported.

## Data statement

Access to the data used can be requested via [www.dhsdata.nl](http://www.dhsdata.nl).

## Contributors

TvdB originally conceived the study. The research questions and analysis plan were agreed by TvdB and MF. TvdB undertook the analyses and TvdB and MF drafted the manuscript. Both authors approved the final draft.

## Funding statement

This research received no specific grant from any funding agency in the public, commercial or not-for-profit sectors.

## Ethics statement

This study was assessed and approved by the Research Ethics Review Committee of the Erasmus School of Health Policy & Management at Erasmus University Rotterdam (Reference: 21-030).

## Conflict of interest

None.

## Introduction

On March 11th, 2020, the World Health Organization declared the novel corona virus SARS-COV2, also known as COVID-19, as a pandemic. Almost immediately, countries started implementing so-called lockdown measures, such as closures of schools and gastronomy and urgent calls to work from whenever possible, in an effort to slow down the spread of the disease. Although necessary to contain the pandemic, these measures also affected people's daily activities in a way that may compromise health, for instance through adverse lifestyle changes.

Shortly after the introduction of the first lockdown measures, scholars already specifically expressed concerns that such measures may result in bodyweight gain [1,2]. Although initial evidence suggests that these concerns are justified (for a review, see Bennett et al., 2021 [3]), results of the work hitherto conducted should be interpreted with caution for multiple reasons. Firstly, most earlier work was cross-sectional or retrospective [3], which makes estimates of bodyweight change prone to recall bias [4]. Secondly, existing studies have drawn almost exclusively on non-probability samples [3], and consequently results cannot be generalized [5]. Thirdly, only few studies have explored potential gender differences in the bodyweight implications of the measures to contain the COVID-19 pandemic. This is unfortunate, because, as described in further detail later, such differences may be expected given the central role of stress in the presumed mechanism linking the measures to contain the COVID-19 pandemic to changes in bodyweight.

The current study assesses the impact of the measures to contain the COVID-19 pandemic on the bodyweight of working age adults in the Netherlands. It extends existing work on the links between the implementation of lockdown measures and bodyweight change (1) by adopting a prospective approach, (2) by drawing on data from a random national sample, and (3) by acknowledging that the bodyweight implications of lockdown measures may differ between men and women.



## Background and hypotheses

In March 2020 the Dutch government announced the first general measures to contain the COVID-19 pandemic. Mid-March, the Netherlands went into a so-called intelligent lockdown that included closure of gastronomy, schools and sports clubs, and a travel ban. The government also made an urgent appeal to work from home whenever possible. These measures were extended through April. During the months of May and June the previously taken lockdown measures were relaxed somewhat and the testing policy got expanded. Over the course of July and August, the numbers of new COVID-19 cases started rising again, but no new measures were taken yet. At the end of September, however, the Dutch government decided that, because of the growing number of infections, additional measures were needed again and a second lockdown was announced in October 2020. Measures of the first intelligent lockdown were reintroduced. On top of this non-essential shops had to close. The second lockdown was extended until early 2021. During this period wearing masks in public places became mandatory and a curfew was introduced. Measures remained in place until February 2021 when the implemented lockdown measures started gradually being relaxed. It is important to note that rules and urgent guidelines regarding hygiene, keeping distance, group formation, and working from home as much as possible had continuously remained in place since March 2020 and were emphasized time and again by the government.

The implemented measures had considerable implications for the personal lives of adults in the Netherlands, particularly among those of working age. In a survey commissioned by the Dutch ministry of Ministry of Health, Welfare and Sport collected among Dutch adults in the spring of 2020, the majority of working age respondents reported substantial changes to their personal situation in the wake of the measures implemented to contain the COVID-19 pandemic [6]. One in three working age respondents reported having started to work from home and one in nine working age respondents reported that the measures to contain the pandemic precluded them from performing their job altogether. One sixth of the working age respondents moreover reported taking care of children as schools and nurseries were closed. In contrast to respondents

1  
2  
3 of working age, 89% of respondents aged 65 years and older reported that little had changed in  
4  
5 their daily lives [6].  
6

7  
8 The changes in the daily lives of the working age population may be expected to have detrimental  
9  
10 lifestyle implications. In the spring of 2020, Bhutani and Cooper [1] already speculated “that  
11  
12 increases in stress, anxiety, and boredom on a daily basis during the pandemic may be  
13  
14 contributing to higher energy intake, sleep disturbances, and less exercise” (p. 1576), which could  
15  
16 ultimately result in bodyweight gain. Similarly, Mattioli et al. warned that stress resulting from  
17  
18 quarantine and isolation measures may lead to unhealthy dietary choices and reduced physical  
19  
20 activity [2]. Consistent with this reasoning, research suggests that Dutch adults were more likely  
21  
22 to be physically inactive in the spring of 2020 than in a typical spring [6]. In an online survey  
23  
24 collected among a nationally representative sample in April 2020, 22% of respondents moreover  
25  
26 reported an increased consumption of snacks and sweets since lockdown measures were in place  
27  
28 and 14% reported eating more frequently overall [7]. These findings from the Netherlands are in  
29  
30 line with results of studies conducted in other contexts, e.g., the United States [8], Spain [9] and  
31  
32 France [10]. We therefore hypothesize that bodyweight increased among working age women  
33  
34 and men following the implementation of COVID-19 lockdown measures in the Netherlands.  
35  
36  
37

38  
39 Given that stress arguably plays an important role in linking lockdown measures to poorer  
40  
41 dietary choices and decreased physical activity [1,2], gender differences in bodyweight gain  
42  
43 following the implementation of measures to contain the pandemic may be expected. This is  
44  
45 because these measures may elicit a stronger stress response among women than among men  
46  
47 [8,11]. Moreover, stress has been found to be more strongly associated with bodyweight gain  
48  
49 among women than among men [12,13]. We therefore hypothesize that bodyweight change  
50  
51 following the implementation of COVID-19 lockdown measures in the Netherlands was more  
52  
53 pronounced for women than for men.  
54  
55  
56  
57  
58  
59  
60

## Data and methods

### Sample

We draw on anonymized public release data from the DNB Household Survey [14,15] (see [www.dhsdata.nl](http://www.dhsdata.nl)), a panel survey collected annually among a random national sample of Dutch households by CentERdata at Tilburg University in the Netherlands. Data have been collected online since 1993. A basic computer and an internet connection were provided to sampled households without a computer or internet access. Currently, 28 waves of data are available.

We restricted the sample to observations of men and women of working age (18-65) who provided valid information on all variables of interest (i.e., bodyweight, age, partner status, primary activity status) in at least two waves. These inclusion criteria resulted in an analytical sample of 19,468 observations nested in 4,365 women and 21,862 observations nested in 4,583 men.

### Patient and public involvement

The DNB Household Survey is collected among the general population of the Netherlands. The panel members provided consent via a multi-stage agreement including the initial recruitment as well as the activation of an account (after login only) in the panel environment. Since the introduction of the General Data Protection Regulation (GDPR) in 2018, panel members who already participated and newly recruited panel members, have been asked to give an explicit informed consent via a web form to (continue) taking part in research projects in the panel, among which the DNB Household Survey. Only respondents who complied could continue to participate in the panels [15].

### Measures

Our outcome of interest is self-reported bodyweight in kilograms. Consistent with earlier studies [16], we considered values below 25 kilograms implausibly low and excluded observations with such values (n=122) from our sample.

1  
2  
3 The main explanatory variable, i.e., whether or not lockdown measures were in place, was derived  
4 from the year of data collection. We compare observations from 2020 (the lockdown year) with  
5 observations from, respectively, 2019 (pre-lockdown year), 2018 (2 years before lockdown),  
6 observations from, respectively, 2019 (pre-lockdown year), 2018 (2 years before lockdown),  
7 2017 (3 years before lockdown) and 1993-2016 (4+ years before lockdown). Consistent with  
8 prior years, the 2020 data collection took place between week 15 and week 41 when lockdown  
9 measures were in place.  
10  
11  
12  
13  
14  
15

16 Controls included in the models are age (continuous, centred on 45), age squared, primary activity  
17 (in paid employment; unemployed; student; homemaker; retired; disabled; other) and presence  
18 of a partner in the household (yes; no). An overview of sample characteristics is provided in Table  
19 1.  
20  
21  
22  
23  
24  
25

26 <Table 1 here>  
27  
28

### 29 **Statistical analysis**

30 We performed fixed-effects regression analyses of intra-individual bodyweight change [17], in  
31 which within-person means over time are subtracted from scores in each observation for both  
32 outcome and explanatory variables. Consequently, all time-invariant characteristics, regardless of  
33 whether observed, are accounted for and omitted variable bias issues are limited to time-varying  
34 factors. We regressed within-person bodyweight change on the year of observation, and adjusted  
35 for the aforementioned controls.  
36  
37  
38  
39  
40  
41  
42  
43

44 Models were stratified by gender. In order to assess whether coefficient estimates significantly  
45 differed between women and men, we additionally estimated a pooled model with interaction  
46 terms to allow the slopes of all explanatory variables to vary as a function of gender [18]. All  
47 models were estimated with robust standard errors to account for the nested nature of the data.  
48  
49  
50  
51  
52  
53

### 54 **Results**

55 <Table 2 here>  
56  
57  
58  
59  
60

1  
2  
3 Results of our fixed-effects analyses are presented in Table 2. As hypothesized, the fixed-effects  
4 model adjusted for age, age squared, partner status and primary activity indicated that women's  
5 bodyweight increased significantly in the COVID-lockdown year of 2020 relative to 2019, 2018,  
6 2017 and the period 2016 and earlier. The estimated magnitude of the adjusted bodyweight  
7 increase in women in 2020 relative to the three preceding years was approximately 800 grams.  
8  
9

10  
11  
12  
13  
14 For men, no significant differences between the year 2020 and the three preceding years were  
15 found. Interestingly, however, the year 2020 was associated with a significant bodyweight  
16 decrease relative to the period 2016 and earlier, but this decrease could not be attributed to the  
17 lockdown measures of 2020, because it already manifested itself in 2019, 2018 and 2017. The  
18 analyses thus did not provide support for the hypothesized bodyweight weight gain in men  
19 following the implementation of the Dutch lockdown measures.  
20  
21  
22  
23  
24  
25  
26  
27

28 The finding of a significant bodyweight gain in women but not in men is insufficient to conclude  
29 that the bodyweight gain in women was significantly stronger than in men [19]. We therefore  
30 performed formal tests of differences between the coefficient estimates in the model for women  
31 and those in the model for men. As shown in the final columns of Table 2, the results indicated  
32 that bodyweight change between 2020 relative to, respectively, 2019, 2017 and the period 2016  
33 and earlier was significantly stronger for women than for men. The gender difference in the  
34 estimated bodyweight change between 2018 and 2020 was marginally significant ( $p=.07$ ). The  
35 combined gender differences in the estimates of the year effects were statistically significant ( $F(4,$   
36  $8947)=3.9, p<.01$ ). These results are consistent with our hypothesis that bodyweight gain  
37 following the implementation of the Dutch lockdown measures was more pronounced among  
38 women than among men.  
39  
40  
41  
42  
43  
44  
45  
46  
47  
48  
49  
50  
51

## 52 Discussion

53  
54  
55 The current study extends prior work on the bodyweight implications of measures to contain the  
56 COVID-19 pandemic by adopting a prospective approach, by drawing on data from a random  
57 national household sample and by acknowledging that the bodyweight implications of lockdown  
58  
59  
60

1  
2  
3 may differ between men and women. Our analyses indicate that the Dutch lockdown measures  
4 were associated with bodyweight gain of approximately 800 grams in working age women. The  
5 effects of lockdown measures on the bodyweight in working age men were less pronounced. In  
6 fact, no significant evidence that the measures were associated with bodyweight gain in men was  
7 found.  
8  
9

10  
11  
12 We presented results of analyses of weight change in kilograms, because the interpretation of this  
13 outcome measure is highly intuitive. It could be argued, however, that a similar bodyweight gain  
14 in kilograms is more meaningful for shorter persons than for their taller counterparts. We  
15 therefore also estimated models with body mass index (weight in kilograms divided by height in  
16 meters squared) as the outcome measure. Results of these analyses (see Appendix A) are  
17 substantively similar to the results of the analyses of bodyweight in kilograms presented in Table  
18 2.  
19  
20  
21  
22  
23  
24  
25  
26  
27  
28  
29

30 An important limitation of the current study is that our measure of bodyweight was self-reported.  
31 Self-reports of bodyweight are, on average, lower than measured bodyweight [16]. However,  
32 given that the extent to which people underreport their weight tends to be stable over time,  
33 within-person changes in self-reported bodyweight – such as analysed here – have been found to  
34 only have minor discrepancies with changes in measured bodyweight [20].  
35  
36  
37  
38  
39  
40

41 Overweight and obesity currently account for almost four percent of the total burden of disease  
42 in the Netherlands [21]. Given that the prevalence of overweight and obesity is projected to  
43 increase in the next decades [21], this percentage may be expected to rise even further. Our results  
44 suggest that the Dutch measures to contain the COVID-19 pandemic may aggravate this trend.  
45 This would particularly be the case if, as suspected by Bhutani and Cooper [1], the relatively small  
46 short-term bodyweight changes reported here result in substantial, permanent weight gain over  
47 time. Future studies could extend the current study by analysing data from upcoming DNB  
48 Household Survey data waves to test whether concerns about the persistence of bodyweight gain  
49 related to the implementation of lockdown measures are justified [22].  
50  
51  
52  
53  
54  
55  
56  
57  
58  
59  
60

## References

- 1 Bhutani S, Cooper JA. COVID-19–related home confinement in adults: Weight gain risks and opportunities. *Obesity* 2020;**28**:1576–7. doi:10.1002/oby.22904
- 2 Mattioli A V, Sciomer S, Cocchi C, *et al.* Quarantine during COVID-19 outbreak: Changes in diet and physical activity increase the risk of cardiovascular disease. *Nutr Metab Cardiovasc Dis* 2020;**30**:1409–17. doi:10.1016/j.numecd.2020.05.020
- 3 Bennett G, Young E, Butler I, *et al.* The impact of lockdown during the COVID-19 outbreak on dietary habits in various population groups: A scoping review. *Front Nutr* 2021;**8**:53. doi:10.3389/fnut.2021.626432
- 4 Coughlin SS. Recall bias in epidemiologic studies. *J Clin Epidemiol* 1990;**43**:87–91. doi:10.1016/0895-4356(90)90060-3
- 5 Battaglia MP. Nonprobability sampling. In: Lavrakas PJ, ed. *Encyclopedia of survey research methods*. Thousand Oaks: : Sage 2011. 524–6.
- 6 Van den Dool R. *Sport en bewegen in tijden van covid-19. Deelname & kijkgedrag volwassenen maart-april 2020*. Utrecht: : Mulier Instituut 2020.
- 7 Poelman MP, Gillebaart M, Schlinkert C, *et al.* Eating behavior and food purchases during the COVID-19 lockdown: A cross-sectional study among adults in the Netherlands. *Appetite* 2021;**157**:105002. doi:https://doi.org/10.1016/j.appet.2020.105002
- 8 Wu K-HH, Hornsby WE, Klunder B, *et al.* Exposure and risk factors for COVID-19 and the impact of staying home on Michigan residents. *PLoS One* 2021;**16**:e0246447. doi:10.1371/journal.pone.0246447
- 9 Castañeda-Babarro A, Arbillaga-Etxarri A, Gutiérrez-Santamaría B, *et al.* Physical activity change during COVID-19 confinement. *Int J Environ Res Public Health* 2020;**17**. doi:10.3390/ijerph17186878
- 10 Marty L, de Lauzon-Guillain B, Labesse M, *et al.* Food choice motives and the nutritional quality of diet during the COVID-19 lockdown in France. *Appetite* 2021;**157**:105005. doi:10.1016/j.appet.2020.105005
- 11 García-Fernández L, Romero-Ferreiro V, Padilla S, *et al.* Gender differences in emotional response to the COVID-19 outbreak in Spain. *Brain Behav* 2021;**11**:e01934. doi:10.1002/brb3.1934
- 12 Block JP, He Y, Zaslavsky AM, *et al.* Psychosocial stress and change in weight among US adults. *Am J Epidemiol* 2009;**170**:181–92. doi:10.1093/aje/kwp104
- 13 Udo T, Grilo CM, McKee SA. Gender differences in the impact of stressful life events on changes in body mass index. *Prev Med (Baltim)* 2014;**69**:49–53. doi:10.1016/j.ypmed.2014.08.036
- 14 Teppa F, Vis C. The CentERpanel and the DNB Household Survey: Methodological Aspects. *DNB Occas Stud* 2012;**10**:1–52.
- 15 De Bruijne M, Streefkerk M. *Data management and preservation policy of the DNB Household Survey (DHS). Version 3.0*. Tilburg: : CentERdata 2020.
- 16 Flegal KM, Ogden CL, Fryar C, *et al.* Comparisons of self-reported and measured height and weight, BMI, and obesity prevalence from national surveys: 1999-2016. *Obesity* 2019;**27**:1711–9. doi:10.1002/oby.22591

- 1  
2  
3 17 Gunasekara FI, Richardson K, Carter K, *et al.* Fixed effects analysis of repeated measures  
4 data. *Int J Epidemiol* 2014;**43**:264–9. doi:10.1093/ije/dyt221  
5  
6 18 Van den Broek T. Gender differences in the correlates of loneliness among Japanese  
7 persons aged 50-70. *Australas J Ageing* 2017;**36**:234–237. doi:10.1111/ajag.12448  
8  
9 19 Gelman A, Stern H. The difference between “significant” and “not significant” is not itself  
10 statistically significant. *Am Stat* 2006;**60**:328–31. doi:10.1198/000313006X152649  
11  
12 20 Field AE, Aneja P, Rosner B. The validity of self-reported weight change among adolescents  
13 and young adults. *Obesity* 2007;**15**:2357–64. doi:https://doi.org/10.1038/oby.2007.279  
14  
15 21 RIVM. *Volksgezondheid Toekomst Verkenning 2018. Een gezond vooruitzicht.* Bilthoven: :  
16 RIVM National Institute for Public Health and the Environment 2018.  
17  
18 22 Demakakos P. Importance of population-based longitudinal studies to understanding the  
19 impact of COVID-19. *J Epidemiol Community Health* Published Online First: 24 May 2021.  
20 doi:10.1136/jech-2021-217114  
21  
22  
23  
24  
25  
26  
27  
28  
29  
30  
31  
32  
33  
34  
35  
36  
37  
38  
39  
40  
41  
42  
43  
44  
45  
46  
47  
48  
49  
50  
51  
52  
53  
54  
55  
56  
57  
58  
59  
60



Table 1. Sample characteristics

|                                                      | Women          |          | Men            |          |
|------------------------------------------------------|----------------|----------|----------------|----------|
|                                                      | Mean / %       | (N)      | Mean / %       | (N)      |
| Mean bodyweight in kilograms<br>(Standard deviation) | 72.0<br>(15.1) |          | 84.1<br>(13.6) |          |
| Year of observation:                                 |                |          |                |          |
| 2020 (Covid-year)                                    | 3.9%           | (768)    | 3.4%           | (746)    |
| 2019 (pre-Covid year)                                | 4.3%           | (845)    | 3.7%           | (808)    |
| 2018 (2 years pre-Covid)                             | 3.7%           | (714)    | 3.2%           | (709)    |
| 2017 (3 years pre-Covid)                             | 4.1%           | (805)    | 3.5%           | (769)    |
| 2016 and prior                                       | 83.9%          | (16,336) | 86.1%          | (18,830) |
| Mean age <sup>a</sup><br>(Standard deviation)        | 44.4<br>(12.1) |          | 46.3<br>(11.7) |          |
| Lives with partner                                   | 77.3%          | (15,040) | 79.9%          | (17,472) |
| Primary activity status:                             |                |          |                |          |
| In paid employment                                   | 54.8%          | (10,666) | 77.3%          | (16,906) |
| Unemployed                                           | 2.7%           | (516)    | 2.7%           | (600)    |
| Student                                              | 7.3%           | (1,412)  | 3.0%           | (653)    |
| Homemaker                                            | 21.2%          | (4,119)  | 1.2%           | (255)    |
| Retired                                              | 4.0%           | (774)    | 8.1%           | (1,778)  |
| Disabled                                             | 4.4%           | (864)    | 4.3%           | (933)    |
| Other                                                | 5.7%           | (1,117)  | 3.4%           | (737)    |
| Number of observations                               | 19,468         |          | 21,862         |          |
| Number of persons                                    | 4,365          |          | 4,583          |          |

Notes: Data are from the DNB Household Survey 1993-2020;

<sup>a</sup> based on values before centring

Table 2. Results of fixed-effects analyses predicting bodyweight change

|                            | Women    |         | Men       |         | Women vs men |         |
|----------------------------|----------|---------|-----------|---------|--------------|---------|
|                            | b        | (SE)    | b         | (SE)    | $\Delta$ b   | (SE)    |
| Year:                      |          |         |           |         |              |         |
| 2020 (Covid-year)          | Ref.     |         | Ref.      |         | Ref.         |         |
| 2019 (pre-Covid year)      | -0.804** | (0.265) | 0.043     | (0.242) | -0.847*      | (0.359) |
| 2018 (2 years pre-Covid)   | -0.799*  | (0.359) | -0.028    | (0.235) | -0.771†      | (0.429) |
| 2017 (3 years pre-Covid)   | -0.816*  | (0.341) | 0.250     | (0.259) | -1.067*      | (0.429) |
| 2016 and prior             | -1.133** | (0.423) | 0.883**   | (0.310) | -2.016***    | (0.525) |
| Time-variant controls:     |          |         |           |         |              |         |
| Age <sup>a</sup>           | 0.255*** | (0.029) | 0.363***  | (0.025) | -0.108**     | (0.039) |
| Age <sup>a</sup> (squared) | -0.003*  | (0.001) | -0.007*** | (0.001) | 0.003†       | (0.002) |
| Lives with partner         | 0.944†   | (0.513) | 0.489     | (0.498) | 0.455        | (0.715) |
| Primary activity status:   |          |         |           |         |              |         |
| In paid employment         | Ref.     |         | Ref.      |         | Ref.         |         |
| Unemployed                 | 0.064    | (0.395) | -0.182    | (0.346) | 0.246        | (0.525) |
| Student                    | 0.247    | (0.299) | -0.368    | (0.495) | 0.616        | (0.578) |
| Homemaker                  | -0.073   | (0.267) | -0.713    | (0.735) | 0.640        | (0.782) |
| Retired                    | 0.022    | (0.346) | -0.704†   | (0.399) | 0.727        | (0.528) |
| Disabled                   | -0.218   | (0.553) | -0.390    | (0.455) | 0.173        | (0.716) |
| Other                      | -0.038   | (0.347) | -0.119    | (0.328) | 0.081        | (0.478) |
| <hr/>                      |          |         |           |         |              |         |
| Number of observations     | 19,468   |         | 21,862    |         |              |         |
| Number of persons          | 4,365    |         | 4,583     |         |              |         |

Notes: Data are from the DNB Household Survey 1993-2020; <sup>a</sup> centred on age 45; †  $p < .1$ , \*  $p < .05$ , \*\*  $p < .01$ , \*\*\*  $p < 0.001$

## Appendix A. Results of fixed-effects analyses predicting body mass index change

|                            | Women     |         | Men       |         | Women vs men |         |
|----------------------------|-----------|---------|-----------|---------|--------------|---------|
|                            | b         | (SE)    | b         | (SE)    | $\Delta b$   | (SE)    |
| Year:                      |           |         |           |         |              |         |
| 2020 (Covid-year)          | Ref.      |         | Ref.      |         | Ref.         |         |
| 2019 (pre-Covid year)      | -0.267*** | (0.068) | -0.049    | (0.060) | -0.217*      | (0.090) |
| 2018 (2 years pre-Covid)   | -0.310*** | (0.087) | -0.021    | (0.068) | -0.289**     | (0.110) |
| 2017 (3 years pre-Covid)   | -0.264**  | (0.098) | 0.060     | (0.074) | -0.325**     | (0.123) |
| 2016 and prior             | -0.331**  | (0.115) | 0.203*    | (0.088) | -0.534***    | (0.145) |
| Time-variant controls:     |           |         |           |         |              |         |
| Age <sup>a</sup>           | 0.093***  | (0.010) | 0.108***  | (0.007) | -0.015       | (0.012) |
| Age <sup>a</sup> (squared) | -0.001†   | (0.000) | -0.002*** | (0.000) | 0.001        | (0.001) |
| Lives with partner         | 0.350*    | (0.173) | 0.139     | (0.133) | 0.211        | (0.218) |
| Primary activity status:   |           |         |           |         |              |         |
| In paid employment         | Ref.      |         | Ref.      |         | Ref.         |         |
| Unemployed                 | -0.044    | (0.101) | -0.083    | (0.083) | 0.038        | (0.131) |
| Student                    | 0.152     | (0.099) | -0.061    | (0.145) | 0.212        | (0.176) |
| Homemaker                  | 0.072     | (0.086) | -0.055    | (0.213) | 0.127        | (0.230) |
| Retired                    | 0.088     | (0.110) | -0.161†   | (0.094) | 0.249        | (0.145) |
| Disabled                   | -0.064    | (0.177) | -0.114    | (0.105) | 0.050        | (0.206) |
| Other                      | 0.040     | (0.102) | -0.024    | (0.081) | 0.064        | (0.130) |
| <hr/>                      |           |         |           |         |              |         |
| Number of observations     | 19,416    |         | 21,806    |         |              |         |
| Number of persons          | 4,357     |         | 4,574     |         |              |         |

Notes: Data are from the DNB Household Survey 1993-2020; <sup>a</sup> centered on age 45; †  $p < .1$ , \*  $p < .05$ , \*\*  $p < .01$ , \*\*\*  $p < 0.001$

**STROBE 2007 (v4) checklist of items to be included in reports of observational studies in epidemiology\***  
**Checklist for cohort, case-control, and cross-sectional studies (combined)**

| Section/Topic             | Item # | Recommendation                                                                                                                                                                                                                                                                                                                                                                                                                                                         | Reported on page # |
|---------------------------|--------|------------------------------------------------------------------------------------------------------------------------------------------------------------------------------------------------------------------------------------------------------------------------------------------------------------------------------------------------------------------------------------------------------------------------------------------------------------------------|--------------------|
| Title and abstract        | 1      | (a) Indicate the study's design with a commonly used term in the title or the abstract                                                                                                                                                                                                                                                                                                                                                                                 | 1, 2               |
|                           |        | (b) Provide in the abstract an informative and balanced summary of what was done and what was found                                                                                                                                                                                                                                                                                                                                                                    | 2                  |
| <b>Introduction</b>       |        |                                                                                                                                                                                                                                                                                                                                                                                                                                                                        |                    |
| Background/rationale      | 2      | Explain the scientific background and rationale for the investigation being reported                                                                                                                                                                                                                                                                                                                                                                                   | 5                  |
| Objectives                | 3      | State specific objectives, including any pre-specified hypotheses                                                                                                                                                                                                                                                                                                                                                                                                      | 5-7                |
| <b>Methods</b>            |        |                                                                                                                                                                                                                                                                                                                                                                                                                                                                        |                    |
| Study design              | 4      | Present key elements of study design early in the paper                                                                                                                                                                                                                                                                                                                                                                                                                | 5, 8-9             |
| Setting                   | 5      | Describe the setting, locations, and relevant dates, including periods of recruitment, exposure, follow-up, and data collection                                                                                                                                                                                                                                                                                                                                        | 5                  |
| Participants              | 6      | (a) <i>Cohort study</i> —Give the eligibility criteria, and the sources and methods of selection of participants. Describe methods of follow-up<br><i>Case-control study</i> —Give the eligibility criteria, and the sources and methods of case ascertainment and control selection. Give the rationale for the choice of cases and controls<br><i>Cross-sectional study</i> —Give the eligibility criteria, and the sources and methods of selection of participants | 5                  |
|                           |        | (b) <i>Cohort study</i> —For matched studies, give matching criteria and number of exposed and unexposed<br><i>Case-control study</i> —For matched studies, give matching criteria and the number of controls per case                                                                                                                                                                                                                                                 |                    |
| Variables                 | 7      | Clearly define all outcomes, exposures, predictors, potential confounders, and effect modifiers. Give diagnostic criteria, if applicable                                                                                                                                                                                                                                                                                                                               | 8-9                |
| Data sources/ measurement | 8*     | For each variable of interest, give sources of data and details of methods of assessment (measurement). Describe comparability of assessment methods if there is more than one group                                                                                                                                                                                                                                                                                   | 8-9                |
| Bias                      | 9      | Describe any efforts to address potential sources of bias                                                                                                                                                                                                                                                                                                                                                                                                              | 9                  |
| Study size                | 10     | Explain how the study size was arrived at                                                                                                                                                                                                                                                                                                                                                                                                                              | 8                  |
| Quantitative variables    | 11     | Explain how quantitative variables were handled in the analyses. If applicable, describe which groupings were chosen and why                                                                                                                                                                                                                                                                                                                                           | 8-9                |
| Statistical methods       | 12     | (a) Describe all statistical methods, including those used to control for confounding                                                                                                                                                                                                                                                                                                                                                                                  | 9                  |
|                           |        | (b) Describe any methods used to examine subgroups and interactions                                                                                                                                                                                                                                                                                                                                                                                                    | 9                  |
|                           |        | (c) Explain how missing data were addressed                                                                                                                                                                                                                                                                                                                                                                                                                            | 8                  |
|                           |        | (d) <i>Cohort study</i> —If applicable, explain how loss to follow-up was addressed<br><i>Case-control study</i> —If applicable, explain how matching of cases and controls was addressed                                                                                                                                                                                                                                                                              |                    |

|                          |     |                                                                                                                                                                                                              |          |
|--------------------------|-----|--------------------------------------------------------------------------------------------------------------------------------------------------------------------------------------------------------------|----------|
|                          |     | <i>Cross-sectional study</i> —If applicable, describe analytical methods taking account of sampling strategy                                                                                                 |          |
|                          |     | (e) Describe any sensitivity analyses                                                                                                                                                                        | 11       |
| <b>Results</b>           |     |                                                                                                                                                                                                              |          |
| Participants             | 13* | (a) Report numbers of individuals at each stage of study—eg numbers potentially eligible, examined for eligibility, confirmed eligible, included in the study, completing follow-up, and analysed            |          |
|                          |     | (b) Give reasons for non-participation at each stage                                                                                                                                                         |          |
|                          |     | (c) Consider use of a flow diagram                                                                                                                                                                           |          |
| Descriptive data         | 14* | (a) Give characteristics of study participants (eg demographic, clinical, social) and information on exposures and potential confounders                                                                     | 14       |
|                          |     | (b) Indicate number of participants with missing data for each variable of interest                                                                                                                          |          |
|                          |     | (c) <i>Cohort study</i> —Summarise follow-up time (eg, average and total amount)                                                                                                                             | 14       |
| Outcome data             | 15* | <i>Cohort study</i> —Report numbers of outcome events or summary measures over time                                                                                                                          | 14       |
|                          |     | <i>Case-control study</i> —Report numbers in each exposure category, or summary measures of exposure                                                                                                         |          |
|                          |     | <i>Cross-sectional study</i> —Report numbers of outcome events or summary measures                                                                                                                           |          |
| Main results             | 16  | (a) Give unadjusted estimates and, if applicable, confounder-adjusted estimates and their precision (eg, 95% confidence interval). Make clear which confounders were adjusted for and why they were included | 9-10, 15 |
|                          |     | (b) Report category boundaries when continuous variables were categorized                                                                                                                                    |          |
|                          |     | (c) If relevant, consider translating estimates of relative risk into absolute risk for a meaningful time period                                                                                             |          |
| Other analyses           | 17  | Report other analyses done—eg analyses of subgroups and interactions, and sensitivity analyses                                                                                                               | 11       |
| <b>Discussion</b>        |     |                                                                                                                                                                                                              |          |
| Key results              | 18  | Summarise key results with reference to study objectives                                                                                                                                                     | 10-11    |
| Limitations              | 19  | Discuss limitations of the study, taking into account sources of potential bias or imprecision. Discuss both direction and magnitude of any potential bias                                                   | 11       |
| Interpretation           | 20  | Give a cautious overall interpretation of results considering objectives, limitations, multiplicity of analyses, results from similar studies, and other relevant evidence                                   | 10, 11   |
| Generalisability         | 21  | Discuss the generalisability (external validity) of the study results                                                                                                                                        | 11       |
| <b>Other information</b> |     |                                                                                                                                                                                                              |          |
| Funding                  | 22  | Give the source of funding and the role of the funders for the present study and, if applicable, for the original study on which the present article is based                                                | 4        |

\*Give information separately for cases and controls in case-control studies and, if applicable, for exposed and unexposed groups in cohort and cross-sectional studies.  
**Note:** An Explanation and Elaboration article discusses each checklist item and gives methodological background and published examples of transparent reporting. The STROBE checklist is best used in conjunction with this article (freely available on the Web sites of PLoS Medicine at <http://www.plosmedicine.org/>, Annals of Internal Medicine at <http://www.annals.org/>, and Epidemiology at <http://www.epidem.com/>). Information on the STROBE Initiative is available at [www.strobe-statement.org](http://www.strobe-statement.org).

# BMJ Open

## Gender differences in bodyweight change following COVID-19 lockdown measures in the Netherlands. A prospective longitudinal study

|                                 |                                                                                                                          |
|---------------------------------|--------------------------------------------------------------------------------------------------------------------------|
| Journal:                        | <i>BMJ Open</i>                                                                                                          |
| Manuscript ID                   | bmjopen-2021-054658.R1                                                                                                   |
| Article Type:                   | Original research                                                                                                        |
| Date Submitted by the Author:   | 12-Jan-2022                                                                                                              |
| Complete List of Authors:       | van den Broek, Thijs; Erasmus University Rotterdam<br>Fleischmann, Maria ; Vrije Universiteit Amsterdam, Health Sciences |
| <b>Primary Subject Heading</b>: | Public health                                                                                                            |
| Secondary Subject Heading:      | Nutrition and metabolism, Public health                                                                                  |
| Keywords:                       | COVID-19, EPIDEMIOLOGY, PUBLIC HEALTH, SOCIAL MEDICINE                                                                   |
|                                 |                                                                                                                          |

SCHOLARONE™  
Manuscripts



I, the Submitting Author has the right to grant and does grant on behalf of all authors of the Work (as defined in the below author licence), an exclusive licence and/or a non-exclusive licence for contributions from authors who are: i) UK Crown employees; ii) where BMJ has agreed a CC-BY licence shall apply, and/or iii) in accordance with the terms applicable for US Federal Government officers or employees acting as part of their official duties; on a worldwide, perpetual, irrevocable, royalty-free basis to BMJ Publishing Group Ltd ("BMJ") its licensees and where the relevant Journal is co-owned by BMJ to the co-owners of the Journal, to publish the Work in this journal and any other BMJ products and to exploit all rights, as set out in our [licence](#).

The Submitting Author accepts and understands that any supply made under these terms is made by BMJ to the Submitting Author unless you are acting as an employee on behalf of your employer or a postgraduate student of an affiliated institution which is paying any applicable article publishing charge ("APC") for Open Access articles. Where the Submitting Author wishes to make the Work available on an Open Access basis (and intends to pay the relevant APC), the terms of reuse of such Open Access shall be governed by a Creative Commons licence – details of these licences and which [Creative Commons](#) licence will apply to this Work are set out in our licence referred to above.

Other than as permitted in any relevant BMJ Author's Self Archiving Policies, I confirm this Work has not been accepted for publication elsewhere, is not being considered for publication elsewhere and does not duplicate material already published. I confirm all authors consent to publication of this Work and authorise the granting of this licence.

1  
2  
3  
4  
5  
6  
7  
8  
9  
10  
11  
12  
13  
14  
15  
16  
17  
18  
19  
20  
21  
22  
23  
24  
25  
26  
27  
28  
29  
30  
31  
32  
33  
34  
35  
36  
37  
38  
39  
40  
41  
42  
43  
44  
45  
46  
47  
48  
49  
50  
51  
52  
53  
54  
55  
56  
57  
58  
59  
60

# Gender differences in bodyweight change following COVID-19 lockdown measures in the Netherlands. A prospective longitudinal study

Thijs van den Broek\*<sup>1</sup> & Maria Fleischmann<sup>2</sup>

<sup>1</sup> Erasmus School of Health Policy & Management, Erasmus University Rotterdam, Postbus 1738, 3000 DR Rotterdam, The Netherlands, +31 10 408 85 77, vandenbroek@eshpm.eur.nl

\*corresponding author

<sup>2</sup> Department of Health Sciences, Vrije Universiteit Amsterdam, Amsterdam, The Netherlands

**Keywords:** gender; longitudinal analysis; overweight; body mass index

**Word count (main text only):** 2,764



## Abstract

*Background:* The current study aimed to prospectively assess bodyweight change following the implementation of lockdown measures to contain the COVID-19 pandemic in the Netherlands, and to explore the potentially moderating role of gender in this association.

*Design:* Using Dutch DNB Household Survey panel data collected between 1993 and 2020, we estimated fixed-effects regression models of bodyweight change. Models were stratified by gender and formal tests of gender differences in coefficient estimates were performed.

*Participants:* 4,365 women and 4,583 men aged 18-65 were included in the study. The total number of observations was 41,330.

*Outcome measures:* Self-reported bodyweight in kilograms. Additional analyses were performed using body mass index (self-reported weight in kilograms divided by self-reported height in meters squared) as the outcome.

*Results:* The implementation of Dutch lockdown measures in 2020 was associated with bodyweight gain of approximately 800 grams in working age women compared to the three prior years. Bodyweight gain in 2020 relative to prior years was significantly stronger for women than for men ( $F(4, 8947) = 3.9, p < .01$ ). No evidence of bodyweight gain in working age men was found.

*Conclusion:* Results indicate that bodyweight gain following COVID-19 lockdown measures in the Netherlands was more pronounced among women than among men. Although necessary to contain the COVID-19 pandemic, lockdown measures may contribute to a different public health challenge in the rising prevalence of overweight and obesity.

## Strengths and limitations of this study

- In contrast to most prior work, the current study uses a prospective approach and data from a random national sample to assess bodyweight change following the implementation of lockdown measures to contain the COVID-19 pandemic among Dutch men and women.
- The current study acknowledges that the bodyweight implications of lockdown measures may differ between men and women by estimating models stratified by gender and performing formal tests of gender differences in coefficient estimates.
- A limitation of the current study is that the measure of bodyweight is self-reported.

## Data statement

Access to the data used can be requested via [www.dhsdata.nl](http://www.dhsdata.nl).

## Contributors

TvdB originally conceived the study. The research questions and analysis plan were agreed by TvdB and MF. TvdB undertook the analyses and TvdB and MF drafted the manuscript. Both authors approved the final draft. Research assistance of Izel Yildirim, who made an overview of the timing of the measures to contain the spread of COVID-19 in the Netherlands, is gratefully acknowledged.

## Funding statement

This research received no specific grant from any funding agency in the public, commercial or not-for-profit sectors.

## Ethics statement

This study was assessed and approved by the Research Ethics Review Committee of the Erasmus School of Health Policy & Management at Erasmus University Rotterdam (Reference: 21-030).

## Conflict of interest

None.

## Introduction

On March 11th, 2020, the World Health Organization declared the novel corona virus SARS-COV2, also known as COVID-19, as a pandemic. Almost immediately, countries started implementing so-called lockdown measures, such as closures of schools and gastronomy and urgent calls to work from home whenever possible, in an effort to slow down the spread of the disease. Although necessary to contain the pandemic, these measures also affected people's daily activities in a way that may compromise health, for instance through adverse lifestyle changes.

Shortly after the introduction of the first lockdown measures, scholars already specifically expressed concerns that such measures may result in bodyweight gain [1,2]. Although initial evidence suggests that these concerns are justified (for reviews, see Bennett et al., 2021 [3] and Khan et al., 2021 [4]), results of the work hitherto conducted should be interpreted with caution for multiple reasons. Firstly, most earlier work was cross-sectional or retrospective [3,4], which makes estimates of bodyweight change prone to recall bias [5]. Secondly, existing studies have drawn almost exclusively on non-probability samples [3,4], and consequently results cannot be generalized [6,7]. Thirdly, only few studies have explored potential gender differences in the bodyweight implications of the measures to contain the COVID-19 pandemic. This is unfortunate, because, as described in further detail later, such differences may be expected given the central role of stress in the presumed mechanism linking the measures to contain the COVID-19 pandemic to changes in bodyweight.

The current study assesses the impact of the measures to contain the COVID-19 pandemic on the bodyweight of working age women and men in the Netherlands. It extends existing work on the links between the implementation of lockdown measures and bodyweight change (1) by adopting a prospective approach, (2) by drawing on data from a random national sample, and (3) by acknowledging that the bodyweight implications of lockdown measures may differ between women and men.

## Background and hypotheses

In March 2020 the Dutch government announced the first general measures to contain the COVID-19 pandemic. Mid-March, the Netherlands went into a so-called intelligent lockdown that included closure of gastronomy, schools and sports clubs, and a travel ban. The government also made an urgent appeal to work from home whenever possible. These measures were extended through April. During the months of May and June the previously taken lockdown measures were relaxed somewhat and the testing policy got expanded. Over the course of July and August, the numbers of new COVID-19 cases started rising again, but no new measures were taken yet. At the end of September, however, the Dutch government decided that, because of the rising number of infections, additional measures were needed again and a second lockdown was announced in October 2020. Measures of the first intelligent lockdown were reintroduced. On top of this, non-essential shops had to close. The second lockdown was extended until early 2021. During this period, wearing masks in public places became mandatory and a curfew was introduced. Measures remained in place until February 2021 when the implemented lockdown measures started gradually being relaxed. In response to rising infection rates and the emergence of the SARS-CoV-2 Omicron variant, restrictive measures were reimplemented from November 2021 onwards, and a complete lockdown, including closures of non-essential shops, was announced mid-December. It is important to note that rules and urgent guidelines regarding hygiene, keeping distance, group formation, and working from home as much as possible had continuously remained in place since March 2020 and were emphasized time and again by the government.

The implemented measures had considerable implications for the personal lives of adults in the Netherlands, particularly among those of working age. In a survey commissioned by the Dutch ministry of Ministry of Health, Welfare and Sport collected among Dutch adults in the spring of 2020, the majority of working age respondents reported substantial changes to their personal situation in the wake of the measures implemented to contain the COVID-19 pandemic [8]. One in three working age respondents reported having started to work from home and one in nine working age respondents reported that the measures to contain the pandemic precluded them

1  
2  
3 from performing their job altogether. One sixth of the working age respondents moreover  
4 reported taking care of children as schools and nurseries were closed. In contrast to respondents  
5 of working age, 89% of respondents aged 65 years and older reported that little had changed in  
6 their daily lives [8].  
7  
8  
9  
10

11  
12 The changes in the daily lives of the working age population may be expected to have detrimental  
13 lifestyle implications. In the spring of 2020, Bhutani and Cooper [1] already speculated “that  
14 increases in stress, anxiety, and boredom on a daily basis during the pandemic may be  
15 contributing to higher energy intake, sleep disturbances, and less exercise” (p. 1576), which could  
16 ultimately result in bodyweight gain. Similarly, Mattioli et al. warned that stress resulting from  
17 quarantine and isolation measures may lead to unhealthy dietary choices and reduced physical  
18 activity [2]. Consistent with this reasoning, research suggests that Dutch adults were more likely  
19 to be physically inactive in the spring of 2020 than in a typical spring [8]. In an online survey  
20 collected among a nationally representative sample in April 2020, 22% of respondents moreover  
21 reported an increased consumption of snacks and sweets since lockdown measures were in place  
22 and 14% reported eating more frequently overall [9]. These findings from the Netherlands are in  
23 line with results of studies conducted in other contexts [10], e.g., the United States [11,12], Canada  
24 [13], the United Kingdom [14], Germany [15,16], France [17], Denmark [18], Spain [19], China  
25 [20] and Japan [21]. We therefore hypothesize that bodyweight increased among working age  
26 women and men following the implementation of COVID-19 lockdown measures in the  
27 Netherlands.  
28  
29  
30  
31  
32  
33  
34  
35  
36  
37  
38  
39  
40  
41  
42  
43  
44  
45  
46

47 Given that stress arguably plays an important role in linking lockdown measures to poorer  
48 dietary choices and decreased physical activity [1,2], gender differences in bodyweight gain  
49 following the implementation of measures to contain the pandemic may be expected. This is  
50 because these measures may elicit a stronger stress response among women than among men  
51 [11,22]. Moreover, stress has been found to be more strongly associated with suboptimal  
52 dietary choices and bodyweight gain among women than among men [23–25]. We therefore  
53  
54  
55  
56  
57  
58  
59  
60

1  
2  
3 hypothesize that bodyweight change following the implementation of COVID-19 lockdown  
4  
5 measures in the Netherlands was more pronounced for women than for men.  
6  
7

## 8 **Data and methods**

### 9 **Sample**

10  
11 We draw on anonymized public release data from the DNB Household Survey [26–28] (see  
12  
13 www.dhsdata.nl), a panel survey collected annually among a random national sample of Dutch  
14  
15 households by CentERdata at Tilburg University in the Netherlands. Data have been collected  
16  
17 online since 1993. A basic computer and an internet connection were provided to sampled  
18  
19 households without a computer or internet access. Currently, 28 waves of data are available.  
20  
21  
22

23  
24 We restricted the sample to observations of men and women of working age (18-65) who  
25  
26 provided valid information on all variables of interest (i.e., bodyweight, age, partner status,  
27  
28 primary activity status) in at least two waves. These inclusion criteria resulted in an analytical  
29  
30 sample of 19,468 observations nested in 4,365 women and 21,862 observations nested in 4,583  
31  
32 men.  
33  
34  
35

### 36 **Patient and public involvement**

37  
38 The DNB Household Survey is collected among the general population of the Netherlands. The  
39  
40 panel members provided consent via a multi-stage agreement including the initial recruitment as  
41  
42 well as the activation of an account (after login only) in the panel environment. Since the  
43  
44 introduction of the General Data Protection Regulation (GDPR) in 2018, panel members who  
45  
46 already participated and newly recruited panel members, have been asked to give an explicit  
47  
48 informed consent via a web form to (continue) taking part in research projects in the panel, among  
49  
50 which the DNB Household Survey. Only respondents who complied could continue to participate  
51  
52 in the panels [28].  
53  
54  
55

56  
57 Panel respondents have the possibility to comment on the questionnaire online, or they may call  
58  
59 the free helpdesk with any comments. This helpdesk is open during regular office hours. In case  
60

1  
2  
3 of (technical) problems related to the completion of the questionnaires or the need for further  
4 assistance, a member of CentERdata will visit the household upon appointment to help them solve  
5 the issue at hand [27].  
6  
7  
8  
9

## 10 **Measures**

11  
12 Our outcome of interest is self-reported bodyweight in kilograms. Consistent with earlier studies  
13 [29,30], we considered values below 25 kilograms implausibly low and excluded observations  
14 with such values (n=122) from our sample.  
15  
16  
17  
18

19 The main explanatory variable, i.e., whether or not lockdown measures were in place, was derived  
20 from the year of data collection. We compare observations from 2020 (the lockdown year) with  
21 observations from, respectively, 2019 (pre-lockdown year), 2018 (2 years before lockdown),  
22 2017 (3 years before lockdown) and 1993-2016 (4+ years before lockdown). Consistent with  
23 prior years, the 2020 data collection took place between week 15 and week 41 when lockdown  
24 measures were in place.  
25  
26  
27  
28  
29  
30  
31  
32

33 Controls included in the models are age (continuous, centred on 45), age squared, primary activity  
34 (in paid employment; unemployed; student; homemaker; retired; disabled; other) and presence  
35 of a partner in the household (yes; no). A brief overview of sample characteristics is provided in  
36 Table 1. Descriptive statistics stratified by period of data collection (2020; 2019; 2018; 2017;  
37 2016 and prior) are presented in Appendix A.  
38  
39  
40  
41  
42  
43

44 <Table 1 here>  
45  
46

## 47 **Statistical analysis**

48  
49 We performed fixed-effects regression analyses of intra-individual bodyweight change [31], in  
50 which within-person means over time are subtracted from scores in each observation for both  
51 outcome and explanatory variables. Consequently, all time-invariant characteristics, regardless of  
52 whether observed, are accounted for and omitted variable bias issues are limited to time-varying  
53  
54  
55  
56  
57  
58  
59  
60



1  
2  
3 factors. We regressed within-person bodyweight change on the year of observation, and adjusted  
4  
5 for the aforementioned controls.  
6  
7

8 Models were stratified by gender. In order to assess whether coefficient estimates significantly  
9  
10 differed between women and men, we additionally estimated a pooled model with interaction  
11  
12 terms to allow the slopes of all explanatory variables to vary as a function of gender [32]. All  
13  
14 models were estimated with robust standard errors to account for the nested nature of the data.  
15  
16

## 17 **Results**

18  
19  
20 Results of our fixed-effects analyses are presented in Table 2. As hypothesized, the fixed-effects  
21  
22 model adjusted for age, age squared, partner status and primary activity indicated that women's  
23  
24 bodyweight increased significantly in the COVID-lockdown year of 2020 relative to 2019, 2018,  
25  
26 2017 and the period 2016 and earlier. The estimated magnitude of the adjusted bodyweight  
27  
28 increase in women in 2020 relative to the three preceding years was approximately 800 grams.  
29  
30

31  
32 For men, no significant differences between the year 2020 and the three preceding years were  
33  
34 found. Interestingly, however, the year 2020 was associated with a significant bodyweight  
35  
36 decrease relative to the period 2016 and earlier, but this decrease could not be attributed to the  
37  
38 lockdown measures of 2020, because it already manifested itself in 2019, 2018 and 2017. The  
39  
40 analyses thus did not provide support for the hypothesized bodyweight weight gain in men  
41  
42 following the implementation of the Dutch lockdown measures.  
43  
44

45 <Table 2 here>  
46  
47

48 The finding of a significant bodyweight gain in women but not in men is insufficient to conclude  
49  
50 that the bodyweight gain in women was significantly stronger than in men [33]. We therefore  
51  
52 performed formal tests of differences between the coefficient estimates in the model for women  
53  
54 and those in the model for men. As shown in the final columns of Table 2, the results indicated  
55  
56 that bodyweight change in 2020 relative to, respectively, 2019, 2017 and the period 2016 and  
57  
58 earlier was significantly stronger for women than for men. The gender difference in the estimated  
59  
60

1  
2  
3 bodyweight change between 2018 and 2020 was marginally significant ( $p = .07$ ). The combined  
4  
5 gender differences in the estimates of the year effects were statistically significant ( $F(4, 8947) =$   
6  
7  $3.9, p < .01$ ). These results are consistent with our hypothesis that bodyweight gain following the  
8  
9 implementation of the Dutch lockdown measures was more pronounced among women than  
10  
11 among men.  
12  
13

## 14 15 **Discussion**

16  
17 The current study extends prior work on the bodyweight implications of measures to contain the  
18  
19 COVID-19 pandemic by adopting a prospective approach, by drawing on data from a random  
20  
21 national household sample and by acknowledging that the bodyweight implications of lockdown  
22  
23 may differ between men and women. Our analyses indicate that the Dutch lockdown measures  
24  
25 were associated with bodyweight gain of approximately 800 grams in working age women. The  
26  
27 effects of lockdown measures on the bodyweight in working age men were significantly less  
28  
29 pronounced. In fact, no statistically significant evidence that the measures were associated with  
30  
31 bodyweight gain in men was found.  
32  
33

34  
35 We presented results of analyses of weight change in kilograms, because the interpretation of this  
36  
37 outcome measure is highly intuitive. It could be argued, however, that a similar bodyweight gain  
38  
39 in kilograms is more meaningful for shorter persons than for their taller counterparts. We  
40  
41 therefore also estimated models with body mass index (self-reported weight in kilograms divided  
42  
43 by self-reported height in meters squared) as the outcome measure. Results of these analyses (see  
44  
45 Appendix B) were substantively similar to the results of the analyses of bodyweight in kilograms  
46  
47 presented in Table 2.  
48  
49

50  
51 The results presented here are consistent with our hypotheses built on prior work showing that  
52  
53 both the stress response to the pandemic [11,22] and the association between stress and  
54  
55 bodyweight gain [23,24] were stronger in women than in men. However, given the absence  
56  
57 of a stress measure in the data used, we cannot be conclusive that stress indeed plays a central  
58  
59 role in the mechanism underlying bodyweight increases following the COVID-19 lockdown  
60

1  
2  
3 measures in the Netherlands. Such bodyweight gains could arguably also be related to losing the  
4 exercise associated with a physically demanding job, which may be ruled out via lockdown.  
5  
6 However, we estimated additional models in which we dichotomized primary activity status (in  
7 paid employment versus not in paid employment) and allowed the lockdown effects to vary as a  
8 function of whether one was employed or not. The results of these analyses did not provide  
9 evidence that bodyweight gain was more pronounced for persons who were in paid employment  
10 than for their counterparts who were not (See Appendix C). Moreover, in 2020 approximately  
11 20% of male workers in the Netherlands had a physically demanding job versus approximately  
12 15% of female workers [34]. If bodyweight gain following the lockdown measures implemented  
13 in the Netherlands were attributable to loss of the exercise that comes with having physically  
14 demanding jobs, one might therefore have expected more pronounced effects for men than for  
15 women. Yet, the opposite pattern was found in our analyses.  
16  
17  
18  
19  
20  
21  
22  
23  
24  
25  
26  
27  
28

29 An important limitation of the current study is that our measure of bodyweight was self-reported.  
30 Self-reports of bodyweight are, on average, lower than measured bodyweight [29,35]. However,  
31 given that the extent to which people underreport their weight tends to be stable over time,  
32 within-person changes in self-reported bodyweight – such as analysed here – have been found to  
33 only have minor discrepancies with changes in measured bodyweight [36].  
34  
35  
36  
37  
38  
39  
40

41 Overweight and obesity currently account for almost four percent of the total burden of disease  
42 in the Netherlands [37]. Given that the prevalence of overweight and obesity is projected to  
43 increase in the next decades [37], this percentage may be expected to rise even further. Our results  
44 suggest that the Dutch measures to contain the COVID-19 pandemic may aggravate this trend.  
45 Research has shown that short-term weight gain, for instance during the holiday season, often  
46 tends to be retained, and that it is a major contributor to long-term excess bodyweight [38].  
47 Working age adults typically gain bodyweight with every additional year of age. For instance,  
48 Peeters et al. [39] reported an average annual bodyweight increase of 0.34 kilograms among  
49 Australian adults and Orpana et al. [40] found that Canadian men gained 0.74 kg and women 0.57  
50 kg over two years. These estimates are approximately similar to our estimates of annual  
51  
52  
53  
54  
55  
56  
57  
58  
59  
60

1  
2  
3 bodyweight gain in Dutch working age women (0.26 kg/m<sup>2</sup> at age 45 (See Table 2); 95% CI:  
4 0.20,0.31) and men (0.36 kg/m<sup>2</sup> at age 45 (See Table 2); 95% CI: 0.31,0.41). It is worth noting that  
5  
6 the additional estimated bodyweight gain in women associated with the COVID-19 lockdown  
7  
8 measures was three times larger than the estimated bodyweight gain associated with a one-year  
9  
10 increase. Differently put, our model suggests that women's increase in bodyweight between  
11  
12 2019 and 2020 was approximately equivalent to what they in non-COVID-19 times would have  
13  
14 gained over four years rather than one year. Restrictive measures furthermore remained in place  
15  
16 after the period analysed here. Future studies could extend the current study by analysing data  
17  
18 from upcoming DNB Household Survey data waves to test whether concerns about the persistence  
19  
20 of bodyweight gain related to the implementation of lockdown measures are justified [41].  
21  
22  
23  
24  
25  
26  
27  
28  
29  
30  
31  
32  
33  
34  
35  
36  
37  
38  
39  
40  
41  
42  
43  
44  
45  
46  
47  
48  
49  
50  
51  
52  
53  
54  
55  
56  
57  
58  
59  
60

## References

- 1 Bhutani S, Cooper JA. COVID-19–related home confinement in adults: Weight gain risks and opportunities. *Obesity* 2020;**28**:1576–7. doi:10.1002/oby.22904
- 2 Mattioli A V, Sciomer S, Cocchi C, *et al.* Quarantine during COVID-19 outbreak: Changes in diet and physical activity increase the risk of cardiovascular disease. *Nutr Metab Cardiovasc Dis* 2020;**30**:1409–17. doi:10.1016/j.numecd.2020.05.020
- 3 Bennett G, Young E, Butler I, *et al.* The impact of lockdown during the COVID-19 outbreak on dietary habits in various population groups: A scoping review. *Front Nutr* 2021;**8**:53. doi:10.3389/fnut.2021.626432
- 4 Khan MAB, Menon P, Govender R, *et al.* Systematic review of the effects of pandemic confinements on body weight and their determinants. *Br J Nutr* 2021;:1–20. doi:10.1017/S0007114521000921
- 5 Coughlin SS. Recall bias in epidemiologic studies. *J Clin Epidemiol* 1990;**43**:87–91. doi:10.1016/0895-4356(90)90060-3
- 6 Battaglia MP. Nonprobability sampling. In: Lavrakas PJ, ed. *Encyclopedia of survey research methods*. Thousand Oaks: : Sage 2011. 524–6.
- 7 Pierce M, McManus S, Jessop C, *et al.* Says who? The significance of sampling in mental health surveys during COVID-19. *The Lancet Psychiatry* 2020;**7**:567–8. doi:10.1016/S2215-0366(20)30237-6
- 8 Van den Dool R. *Sport en bewegen in tijden van covid-19. Deelname & kijkgedrag volwassenen maart-april 2020*. Utrecht: : Mulier Instituut 2020.
- 9 Poelman MP, Gillebaart M, Schlinkert C, *et al.* Eating behavior and food purchases during the COVID-19 lockdown: A cross-sectional study among adults in the Netherlands. *Appetite* 2021;**157**:105002. doi:https://doi.org/10.1016/j.appet.2020.105002
- 10 Stockwell S, Trott M, Tully M, *et al.* Changes in physical activity and sedentary behaviours from before to during the COVID-19 pandemic lockdown: A systematic review. *BMJ Open Sport Exerc Med* 2021;**7**:e000960. doi:10.1136/bmjsem-2020-000960
- 11 Wu K-HH, Hornsby WE, Klunder B, *et al.* Exposure and risk factors for COVID-19 and the impact of staying home on Michigan residents. *PLoS One* 2021;**16**:e0246447. doi:10.1371/journal.pone.0246447
- 12 Seal A, Schaffner A, Phelan S, *et al.* COVID-19 pandemic and stay-at-home mandates promote weight gain in US adults. *Obesity* 2022;**30**:240–8. doi:10.1002/oby.23293
- 13 Rhodes RE, Liu S, Lithopoulos A, *et al.* Correlates of perceived physical activity transitions during the COVID-19 pandemic among Canadian adults. *Appl Psychol Heal Well-Being* 2020;**12**:1157–82. doi:10.1111/aphw.12236
- 14 Buckland NJ, Swinnerton LF, Ng K, *et al.* Susceptibility to increased high energy dense sweet and savoury food intake in response to the COVID-19 lockdown: The role of craving control and acceptance coping strategies. *Appetite* 2021;**158**:105017. doi:https://doi.org/10.1016/j.appet.2020.105017
- 15 Huber BC, Steffen J, Schlichtiger J, *et al.* Altered nutrition behavior during COVID-19 pandemic lockdown in young adults. *Eur J Nutr* 2021;**60**:2593–602. doi:10.1007/s00394-020-02435-6
- 16 Mutz M, Gerke M. Sport and exercise in times of self-quarantine: How Germans changed

- 1  
2  
3 their behaviour at the beginning of the Covid-19 pandemic. *Int Rev Sociol Sport*  
4 2021;**56**:305–16. doi:10.1177/1012690220934335  
5
- 6 17 Marty L, de Lauzon-Guillain B, Labesse M, *et al.* Food choice motives and the nutritional  
7 quality of diet during the COVID-19 lockdown in France. *Appetite* 2021;**157**:105005.  
8 doi:10.1016/j.appet.2020.105005  
9
- 10 18 Giacalone D, Frøst MB, Rodríguez-Pérez C. Reported changes in dietary habits during the  
11 COVID-19 lockdown in the Danish population: The Danish COVIDiet study. *Front. Nutr.*  
12 2020;**7**:294. doi:10.3389/fnut.2020.592112  
13
- 14 19 Castañeda-Babarro A, Arbillaga-Etxarri A, Gutiérrez-Santamaría B, *et al.* Physical activity  
15 change during COVID-19 confinement. *Int J Environ Res Public Health* 2020;**17**.  
16 doi:10.3390/ijerph17186878  
17
- 18 20 Dun Y, Ripley-Gonzalez JW, Zhou N, *et al.* Weight gain in Chinese youth during a 4-month  
19 COVID-19 lockdown: a retrospective observational study. *BMJ Open* 2021;**11**:e052451.  
20 doi:10.1136/bmjopen-2021-052451  
21
- 22 21 Tanaka N, Hamamoto Y, Kurotobi Y, *et al.* Lifestyle changes as a result of COVID-19  
23 containment measures: Bodyweight and glycemic control in patients with diabetes in the  
24 Japanese declaration of a state of emergency. *J Diabetes Investig* 2021;**12**:1718–22.  
25 doi:10.1111/jdi.13526  
26
- 27 22 García-Fernández L, Romero-Ferreiro V, Padilla S, *et al.* Gender differences in emotional  
28 response to the COVID-19 outbreak in Spain. *Brain Behav* 2021;**11**:e01934.  
29 doi:10.1002/brb3.1934  
30
- 31 23 Block JP, He Y, Zaslavsky AM, *et al.* Psychosocial stress and change in weight among US  
32 adults. *Am J Epidemiol* 2009;**170**:181–92. doi:10.1093/aje/kwp104  
33
- 34 24 Udo T, Grilo CM, McKee SA. Gender differences in the impact of stressful life events on  
35 changes in body mass index. *Prev Med (Baltim)* 2014;**69**:49–53.  
36 doi:10.1016/j.ypmed.2014.08.036  
37
- 38 25 Lim EX, Sim AY, Forde CG, *et al.* The role of perceived stress and gender on portion selection  
39 patterns. *Physiol Behav* 2018;**194**:205–11. doi:10.1016/j.physbeh.2018.05.031  
40
- 41 [dataset] 26 CentERdata. DNB Household Survey, waves 1993 - 2020. CentERdata repository,  
42 May 2021. <https://www.dhsdata.nl/site/users/login>  
43
- 44 27 Teppa F, Vis C. The CentERpanel and the DNB Household Survey: Methodological Aspects.  
45 *DNB Occas Stud* 2012;**10**:1–52.  
46
- 47 28 De Bruijne M, Streefkerk M. *Data management and preservation policy of the DNB Household*  
48 *Survey (DHS). Version 3.0.* Tilburg: : CentERdata 2020.  
49
- 50 29 Flegal KM, Ogden CL, Fryar C, *et al.* Comparisons of self-reported and measured height and  
51 weight, BMI, and obesity prevalence from national surveys: 1999-2016. *Obesity*  
52 2019;**27**:1711–9. doi:10.1002/oby.22591  
53
- 54 30 Van den Broek T, Fleischmann M. The causal effect of number of children on later-life  
55 overweight and obesity in parous women. An instrumental variable study. *Prev Med*  
56 *Reports* 2021;**24**:101528. doi:10.1016/j.pmedr.2021.101528  
57
- 58 31 Gunasekara FI, Richardson K, Carter K, *et al.* Fixed effects analysis of repeated measures  
59 data. *Int J Epidemiol* 2014;**43**:264–9. doi:10.1093/ije/dyt221  
60
- 32 Van den Broek T. Gender differences in the correlates of loneliness among Japanese  
persons aged 50-70. *Australas J Ageing* 2017;**36**:234–237. doi:10.1111/ajag.12448

- 1  
2  
3 33 Gelman A, Stern H. The difference between “significant” and “not significant” is not itself  
4 statistically significant. *Am Stat* 2006;**60**:328–31. doi:10.1198/000313006X152649  
5  
6 34 Statistics Netherlands. Fysieke arbeidsbelasting werknemers; geslacht en leeftijd.  
7 2021.<https://opendata.cbs.nl/statline/#/CBS/nl/dataset/83044NED/table?dl=5FE3B>  
8  
9 35 Hodge JM, Shah R, McCullough ML, *et al.* Validation of self-reported height and weight in a  
10 large, nationwide cohort of U.S. adults. *PLoS One* 2020;**15**:e0231229.  
11 doi:10.1371/journal.pone.0231229  
12  
13 36 Field AE, Aneja P, Rosner B. The validity of self-reported weight change among adolescents  
14 and young adults. *Obesity* 2007;**15**:2357–64. doi:<https://doi.org/10.1038/oby.2007.279>  
15  
16 37 RIVM. *Volksgezondheid Toekomst Verkenning 2018. Een gezond vooruitzicht.* Bilthoven: :  
17 RIVM National Institute for Public Health and the Environment 2018.  
18  
19 38 Schoeller DA. The effect of holiday weight gain on body weight. *Physiol Behav*  
20 2014;**134**:66–9. doi:10.1016/j.physbeh.2014.03.018  
21  
22 39 Peeters A, Magliano DJ, Backholer K, *et al.* Changes in the rates of weight and waist  
23 circumference gain in Australian adults over time: A longitudinal cohort study. *BMJ Open*  
24 2014;**4**:e003667. doi:10.1136/bmjopen-2013-003667  
25  
26 40 Orpana HM, Tremblay MS, Fines P. *Trends in weight change among Canadian adults:  
27 Evidence from the 1996/1997 to 2004/2005 National Population Health Survey.* Ottawa: :  
28 Statistics Canada 2006.  
29  
30 41 Demakakos P. Importance of population-based longitudinal studies to understanding the  
31 impact of COVID-19. *J Epidemiol Community Health* 2021;**75**:815-816. doi:10.1136/jech-  
32 2021-217114  
33  
34  
35  
36  
37  
38  
39  
40  
41  
42  
43  
44  
45  
46  
47  
48  
49  
50  
51  
52  
53  
54  
55  
56  
57  
58  
59  
60

Table 1. Sample characteristics for women and men.

|                                                      | Women          |          | Men            |          |
|------------------------------------------------------|----------------|----------|----------------|----------|
|                                                      | Mean / %       | (N)      | Mean / %       | (N)      |
| Mean bodyweight in kilograms<br>(Standard deviation) | 72.0<br>(15.1) |          | 84.1<br>(13.6) |          |
| Year of observation:                                 |                |          |                |          |
| 2020 (Covid-year)                                    | 3.9%           | (768)    | 3.4%           | (746)    |
| 2019 (pre-Covid year)                                | 4.3%           | (845)    | 3.7%           | (808)    |
| 2018 (2 years pre-Covid)                             | 3.7%           | (714)    | 3.2%           | (709)    |
| 2017 (3 years pre-Covid)                             | 4.1%           | (805)    | 3.5%           | (769)    |
| 2016 and prior                                       | 83.9%          | (16,336) | 86.1%          | (18,830) |
| Mean age <sup>a</sup><br>(Standard deviation)        | 44.4<br>(12.1) |          | 46.3<br>(11.7) |          |
| Lives with partner                                   | 77.3%          | (15,040) | 79.9%          | (17,472) |
| Primary activity status:                             |                |          |                |          |
| In paid employment                                   | 54.8%          | (10,666) | 77.3%          | (16,906) |
| Unemployed                                           | 2.7%           | (516)    | 2.7%           | (600)    |
| Student                                              | 7.3%           | (1,412)  | 3.0%           | (653)    |
| Homemaker                                            | 21.2%          | (4,119)  | 1.2%           | (255)    |
| Retired                                              | 4.0%           | (774)    | 8.1%           | (1,778)  |
| Disabled                                             | 4.4%           | (864)    | 4.3%           | (933)    |
| Other                                                | 5.7%           | (1,117)  | 3.4%           | (737)    |
| Number of observations                               | 19,468         |          | 21,862         |          |
| Number of persons                                    | 4,365          |          | 4,583          |          |

Notes: Data are from the DNB Household Survey 1993-2020;

<sup>a</sup> based on values before centring



Table 2. Results of fixed-effects analyses predicting bodyweight change in women and men; coefficient estimates with 95% confidence intervals.

|                            | Women    |                 | Men       |                 | Women vs men |                 |
|----------------------------|----------|-----------------|-----------|-----------------|--------------|-----------------|
|                            | b        | [95% CI]        | b         | [95% CI]        | Δb           | [95% CI]        |
| Year:                      |          |                 |           |                 |              |                 |
| 2020 (Covid-year)          | Ref.     |                 | Ref.      |                 | Ref.         |                 |
| 2019 (pre-Covid year)      | -0.804** | [-1.322,-0.285] | 0.043     | [-0.432,0.518]  | -0.847*      | [-1.550,-0.144] |
| 2018 (2 years pre-Covid)   | -0.799*  | [-1.504,-0.095] | -0.028    | [-0.489,0.432]  | -0.771†      | [-1.612,0.071]  |
| 2017 (3 years pre-Covid)   | -0.816*  | [-1.485,-0.148] | 0.250     | [-0.258,0.758]  | -1.067*      | [-1.906,-0.227] |
| 2016 and prior             | -1.133** | [-1.962,-0.303] | 0.883**   | [0.274,1.492]   | -2.016***    | [-3.044,-0.987] |
| Time-variant controls:     |          |                 |           |                 |              |                 |
| Age <sup>a</sup>           | 0.255*** | [0.197,0.312]   | 0.363***  | [0.313,0.412]   | -0.108**     | [-.184,-0.32]   |
| Age <sup>a</sup> (squared) | -0.003*  | [-0.006,-0.001] | -0.007*** | [-0.009,-0.004] | 0.003†       | [-0.000,0.007]  |
| Lives with partner         | 0.944†   | [-0.061,1.949]  | 0.489     | [-0.487,1.465]  | 0.455        | [-0.956,1.856]  |
| Primary activity status:   |          |                 |           |                 |              |                 |
| In paid employment         | Ref.     |                 | Ref.      |                 | Ref.         |                 |
| Unemployed                 | 0.064    | [-0.710,0.838]  | -0.182    | [-0.860,0.495]  | 0.246        | [-0.782,1.274]  |
| Student                    | 0.247    | [-0.338,0.833]  | -0.368    | [-1.339,0.602]  | 0.616        | [-0.518,1.749]  |
| Homemaker                  | -0.073   | [-0.596,0.450]  | -0.713    | [-2.154,0.729]  | 0.640        | [-0.893,2.173]  |
| Retired                    | 0.022    | [-0.656,0.700]  | -0.704†   | [-1.486,0.078]  | 0.727        | [-0.308,1.761]  |
| Disabled                   | -0.218   | [-1.302,0.867]  | -0.390    | [-1.283,0.502]  | 0.173        | [-1.231,1.577]  |
| Other                      | -0.038   | [-0.718,0.643]  | -0.119    | [-0.762,0.525]  | 0.081        | [-0.856,1.017]  |
| Number of observations     | 19,468   |                 | 21,862    |                 |              |                 |
| Number of persons          | 4,365    |                 | 4,583     |                 |              |                 |

Notes: Data are from the DNB Household Survey 1993-2020; <sup>a</sup> centred on age 45;

†  $p < .1$ , \*  $p < .05$ , \*\*  $p < .01$ , \*\*\*  $p < 0.001$

## Appendix A. Sample characteristics; stratified by gender and period of observation.

|                                                      | Women          |        |        |        |        | Men            |        |        |        |        |
|------------------------------------------------------|----------------|--------|--------|--------|--------|----------------|--------|--------|--------|--------|
|                                                      | 2016 and prior | 2017   | 2018   | 2019   | 2020   | 2016 and prior | 2017   | 2018   | 2019   | 2020   |
| Mean age <sup>a</sup>                                | 44.4           | 44.1   | 44.3   | 44.6   | 45.4   | 46.2           | 46.5   | 46.6   | 47.5   | 48.3   |
| (Standard deviation)                                 | (12.0)         | (12.6) | (12.8) | (12.6) | (12.4) | (11.7)         | (12.0) | (12.3) | (12.0) | (11.9) |
| Lives with partner                                   | 79.2%          | 67.3%  | 64.8%  | 67.2%  | 68.4%  | 81.7%          | 71.1%  | 67.0%  | 68.9%  | 68.1%  |
| Primary activity status:                             |                |        |        |        |        |                |        |        |        |        |
| In paid employment                                   | 52.8%          | 63.6%  | 64.8%  | 65.2%  | 66.7%  | 76.9%          | 81.5%  | 79.5%  | 80.8%  | 79.2%  |
| Unemployed                                           | 2.7%           | 2.4%   | 1.8%   | 2.1%   | 2.7%   | 2.7%           | 3.3%   | 2.5%   | 2.5%   | 3.8%   |
| Student                                              | 7.6%           | 5.5%   | 6.7%   | 6.2%   | 4.4%   | 2.8%           | 3.8%   | 5.9%   | 4.5%   | 3.8%   |
| Homemaker                                            | 22.9%          | 13.0%  | 11.8%  | 12.2%  | 12.1%  | 1.2%           | 0.9%   | 1.0%   | 1.2%   | 1.7%   |
| Retired                                              | 4.5%           | 1.5%   | 1.3%   | 0.8%   | 1.2%   | 9.0%           | 2.3%   | 2.3%   | 2.7%   | 3.1%   |
| Disabled                                             | 3.7%           | 8.8%   | 9.1%   | 7.6%   | 8.2%   | 4.0%           | 5.2%   | 5.8%   | 5.6%   | 6.0%   |
| Other                                                | 5.9%           | 5.2%   | 4.5%   | 5.9%   | 4.7%   | 3.5%           | 3.0%   | 3.0%   | 2.7%   | 2.4%   |
| Mean bodyweight in kilograms                         | 71.3           | 74.8   | 75.2   | 74.9   | 76.1   | 83.7           | 86.8   | 86.5   | 86.5   | 86.9   |
| (Standard deviation)                                 | (14.5)         | (16.8) | (17.5) | (16.8) | (17.6) | (13.4)         | (14.7) | (14.5) | (15.2) | (15.1) |
| Mean Body Mass Index (BMI)                           | 25.0           | 26.0   | 26.2   | 26.1   | 26.5   | 25.5           | 26.0   | 26.0   | 26.1   | 26.3   |
| (Standard deviation)                                 | (4.6)          | (5.5)  | (5.8)  | (5.5)  | (5.7)  | (3.6)          | (4.0)  | (4.0)  | (4.1)  | (4.1)  |
| BMI Category:                                        |                |        |        |        |        |                |        |        |        |        |
| Not overweight (< 25 kg/m <sup>2</sup> )             | 57.2%          | 49.2%  | 48.5%  | 49.7%  | 47.6%  | 49.7%          | 47.2%  | 46.9%  | 47.0%  | 45.2%  |
| Overweight (25-30 kg/m <sup>2</sup> )                | 29.6%          | 32.2%  | 31.5%  | 30.2%  | 29.5%  | 41.1%          | 38.1%  | 38.3%  | 37.7%  | 38.7%  |
| Obese (>= 30 kg/m <sup>2</sup> )                     | 13.1%          | 18.6%  | 20.1%  | 20.0%  | 22.9%  | 9.1%           | 14.7%  | 14.8%  | 15.4%  | 16.1%  |
| Number of observations                               | 16,336         | 805    | 714    | 845    | 768    | 18,830         | 769    | 709    | 808    | 746    |
| Number of observations with complete BMI information | 16,298         | 803    | 712    | 843    | 765    | 18,787         | 769    | 708    | 807    | 744    |

Notes: Data are from the DNB Household Survey 1993-2020;

<sup>a</sup> based on values before centring

Appendix B. Results of fixed-effects analyses predicting bod mass index in women and men; coefficient estimates with 95% confidence intervals.

|                            | Women     |                 | Men       |                 | Women vs men |                 |
|----------------------------|-----------|-----------------|-----------|-----------------|--------------|-----------------|
|                            | b         | [95% CI]        | b         | [95% CI]        | Δb           | [95% CI]        |
| Year:                      |           |                 |           |                 |              |                 |
| 2020 (Covid-year)          | Ref.      |                 | Ref.      |                 | Ref.         |                 |
| 2019 (pre-Covid year)      | -0.267*** | [-0.399,-0.134] | -0.049    | [-0.166,0.067]  | -0.217*      | [-0.394,-0.041] |
| 2018 (2 years pre-Covid)   | -0.310*** | [-0.481,-0.140] | -0.021    | [-0.153,0.112]  | -0.289**     | [-0.505,-0.073] |
| 2017 (3 years pre-Covid)   | -0.264**  | [-0.457,-0.072] | 0.060     | [-0.084,0.205]  | -0.325**     | [-0.565,-0.084] |
| 2016 and prior             | -0.331**  | [-0.557,-0.105] | 0.203*    | [0.031,0.375]   | -0.534***    | [-0.818,-0.250] |
| Time-variant controls:     |           |                 |           |                 |              |                 |
| Age <sup>a</sup>           | 0.093***  | [0.074,0.113]   | 0.108***  | [0.094,0.122]   | -0.015       | [-0.039,0.009]  |
| Age <sup>a</sup> (squared) | -0.001†   | [-0.002,0.000]  | -0.002*** | [-0.002,-0.001] | 0.001        | [-0.000,0.002]  |
| Lives with partner         | 0.350*    | [0.010,0.690]   | 0.139     | [-0.121,0.399]  | 0.211        | [-0.216,0.639]  |
| Primary activity status:   |           |                 |           |                 |              |                 |
| In paid employment         | Ref.      |                 | Ref.      |                 | Ref.         |                 |
| Unemployed                 | -0.044    | [-0.242,0.154]  | -0.083    | [-0.245,0.080]  | 0.038        | [-0.218,0.294]  |
| Student                    | 0.152     | [-0.043,0.346]  | -0.061    | [-0.345,0.224]  | 0.212        | [-0.132,0.556]  |
| Homemaker                  | 0.072     | [-0.097,0.241]  | -0.055    | [-0.472,0.362]  | 0.127        | [-0.323,0.577]  |
| Retired                    | 0.088     | [-0.128,0.304]  | -0.161†   | [-0.344,0.023]  | 0.249†       | [-0.035,0.532]  |
| Disabled                   | -0.064    | [-0.410,0.283]  | -0.114    | [-0.321,0.093]  | 0.050        | [-0.353,0.453]  |
| Other                      | 0.040     | [-0.159,0.239]  | -0.024    | [-0.182,0.134]  | 0.064        | [-0.191,0.318]  |
| Number of observations     | 19,416    |                 | 21,806    |                 |              |                 |
| Number of persons          | 4,357     |                 | 4,574     |                 |              |                 |

Notes: Data are from the DNB Household Survey 1993-2020; <sup>a</sup> centred on age 45;  
†  $p < .1$ , \*  $p < .05$ , \*\*  $p < .01$ , \*\*\*  $p < 0.001$

Appendix C. Results of fixed-effects analyses predicting bodyweight change in women and men; coefficient estimates with 95% confidence intervals.

|                                                   | Women    |                 | Men       |                 | Women vs men |                 |
|---------------------------------------------------|----------|-----------------|-----------|-----------------|--------------|-----------------|
|                                                   | b        | [95% CI]        | b         | [95% CI]        | $\Delta$ b   | [95% CI]        |
| Year:                                             |          |                 |           |                 |              |                 |
| 2020 (Covid-year)                                 | Ref.     |                 | Ref.      |                 | Ref.         |                 |
| 2019 (pre-Covid year)                             | -0.760** | [-1.241,-0.280] | -0.131    | [-0.577,0.314]  | -0.629†      | [-1.285,0.026]  |
| 2018 (2 years pre-Covid)                          | -0.905** | [-1.558,-0.252] | -0.073    | [-0.573,0.428]  | -0.832*      | [-1.654,-0.010] |
| 2017 (3 years pre-Covid)                          | -0.781*  | [-1.463,-0.099] | 0.296     | [-0.276,0.869]  | -1.078*      | [-1.968,-0.187] |
| 2016 and prior                                    | -1.111*  | [-1.962,-0.261] | 0.935**   | [0.285,1.584]   | -2.046***    | [-3.116,-0.977] |
| Time-variant controls:                            |          |                 |           |                 |              |                 |
| Age <sup>a</sup>                                  | 0.259*** | [0.202,0.316]   | 0.362***  | [0.313,0.411]   | -0.103**     | [-0.178,-0.028] |
| Age <sup>a</sup> (squared)                        | -0.003*  | [-0.006,-0.001] | -0.007*** | [-0.010,-0.005] | 0.004†       | [-0.000,0.007]  |
| Lives with partner                                | 0.932†   | [-0.076,1.941]  | 0.487     | [-0.491,1.465]  | 0.445        | [-0.959,1.850]  |
| Not in paid employment                            | -0.166   | [-1.986,1.654]  | -0.063    | [-1.503,1.377]  | -0.103       | [-2.423,2.217]  |
| 2019 (pre-Covid year) x not in paid employment    | -0.091   | [-1.504,1.323]  | 0.931     | [-0.813,2.674]  | -1.022       | [-3.266,1.223]  |
| 2018 (2 years pre-Covid) x not in paid employment | 0.361    | [-1.505,2.228]  | 0.199     | [-1.100,1.498]  | 0.162        | [-2.111,2.436]  |
| 2017 (3 years pre-Covid) x not in paid employment | -0.010   | [-1.663,1.643]  | -0.312    | [-1.665,1.042]  | 0.302        | [-1.835,2.438]  |
| 2016 and prior x not in paid employment           | 0.183    | [-1.619,1.984]  | -0.417    | [-1.868,1.034]  | 0.600        | [-1.713,2.913]  |
| <hr/>                                             |          |                 |           |                 |              |                 |
| Number of observations                            | 19,468   |                 | 21,862    |                 |              |                 |
| Number of persons                                 | 4,365    |                 | 4,583     |                 |              |                 |

Notes: Data are from the DNB Household Survey 1993-2020; <sup>a</sup> centred on age 45;

†  $p < .1$ , \*  $p < .05$ , \*\*  $p < .01$ , \*\*\*  $p < 0.001$

**STROBE 2007 (v4) checklist of items to be included in reports of observational studies in epidemiology\***  
**Checklist for cohort, case-control, and cross-sectional studies (combined)**

| Section/Topic             | Item # | Recommendation                                                                                                                                                                                                                                                                                                                                                                                                                                                         | Reported on page # |
|---------------------------|--------|------------------------------------------------------------------------------------------------------------------------------------------------------------------------------------------------------------------------------------------------------------------------------------------------------------------------------------------------------------------------------------------------------------------------------------------------------------------------|--------------------|
| Title and abstract        | 1      | (a) Indicate the study's design with a commonly used term in the title or the abstract                                                                                                                                                                                                                                                                                                                                                                                 | 1, 2               |
|                           |        | (b) Provide in the abstract an informative and balanced summary of what was done and what was found                                                                                                                                                                                                                                                                                                                                                                    | 2                  |
| <b>Introduction</b>       |        |                                                                                                                                                                                                                                                                                                                                                                                                                                                                        |                    |
| Background/rationale      | 2      | Explain the scientific background and rationale for the investigation being reported                                                                                                                                                                                                                                                                                                                                                                                   | 5                  |
| Objectives                | 3      | State specific objectives, including any pre-specified hypotheses                                                                                                                                                                                                                                                                                                                                                                                                      | 5-8                |
| <b>Methods</b>            |        |                                                                                                                                                                                                                                                                                                                                                                                                                                                                        |                    |
| Study design              | 4      | Present key elements of study design early in the paper                                                                                                                                                                                                                                                                                                                                                                                                                | 5, 8-10            |
| Setting                   | 5      | Describe the setting, locations, and relevant dates, including periods of recruitment, exposure, follow-up, and data collection                                                                                                                                                                                                                                                                                                                                        | 8                  |
| Participants              | 6      | (a) <i>Cohort study</i> —Give the eligibility criteria, and the sources and methods of selection of participants. Describe methods of follow-up<br><i>Case-control study</i> —Give the eligibility criteria, and the sources and methods of case ascertainment and control selection. Give the rationale for the choice of cases and controls<br><i>Cross-sectional study</i> —Give the eligibility criteria, and the sources and methods of selection of participants | 8                  |
|                           |        | (b) <i>Cohort study</i> —For matched studies, give matching criteria and number of exposed and unexposed<br><i>Case-control study</i> —For matched studies, give matching criteria and the number of controls per case                                                                                                                                                                                                                                                 | N/A                |
| Variables                 | 7      | Clearly define all outcomes, exposures, predictors, potential confounders, and effect modifiers. Give diagnostic criteria, if applicable                                                                                                                                                                                                                                                                                                                               | 9                  |
| Data sources/ measurement | 8*     | For each variable of interest, give sources of data and details of methods of assessment (measurement). Describe comparability of assessment methods if there is more than one group                                                                                                                                                                                                                                                                                   | 9                  |
| Bias                      | 9      | Describe any efforts to address potential sources of bias                                                                                                                                                                                                                                                                                                                                                                                                              | 9-10               |
| Study size                | 10     | Explain how the study size was arrived at                                                                                                                                                                                                                                                                                                                                                                                                                              | 8                  |
| Quantitative variables    | 11     | Explain how quantitative variables were handled in the analyses. If applicable, describe which groupings were chosen and why                                                                                                                                                                                                                                                                                                                                           | 8-10               |
| Statistical methods       | 12     | (a) Describe all statistical methods, including those used to control for confounding                                                                                                                                                                                                                                                                                                                                                                                  | 9-10               |
|                           |        | (b) Describe any methods used to examine subgroups and interactions                                                                                                                                                                                                                                                                                                                                                                                                    | 9-10               |
|                           |        | (c) Explain how missing data were addressed                                                                                                                                                                                                                                                                                                                                                                                                                            | 8-9                |
|                           |        | (d) <i>Cohort study</i> —If applicable, explain how loss to follow-up was addressed<br><i>Case-control study</i> —If applicable, explain how matching of cases and controls was addressed                                                                                                                                                                                                                                                                              | N/A                |

|                          |     |                                                                                                                                                                                                              |             |
|--------------------------|-----|--------------------------------------------------------------------------------------------------------------------------------------------------------------------------------------------------------------|-------------|
|                          |     | <i>Cross-sectional study</i> —If applicable, describe analytical methods taking account of sampling strategy                                                                                                 |             |
|                          |     | (e) Describe any sensitivity analyses                                                                                                                                                                        | 11-12       |
| <b>Results</b>           |     |                                                                                                                                                                                                              |             |
| Participants             | 13* | (a) Report numbers of individuals at each stage of study—eg numbers potentially eligible, examined for eligibility, confirmed eligible, included in the study, completing follow-up, and analysed            | 8           |
|                          |     | (b) Give reasons for non-participation at each stage                                                                                                                                                         | 8           |
|                          |     | (c) Consider use of a flow diagram                                                                                                                                                                           | N/A         |
| Descriptive data         | 14* | (a) Give characteristics of study participants (eg demographic, clinical, social) and information on exposures and potential confounders                                                                     | 14          |
|                          |     | (b) Indicate number of participants with missing data for each variable of interest                                                                                                                          | Appendix A  |
|                          |     | (c) <i>Cohort study</i> —Summarise follow-up time (eg, average and total amount)                                                                                                                             | 14          |
| Outcome data             | 15* | <i>Cohort study</i> —Report numbers of outcome events or summary measures over time                                                                                                                          | 14          |
|                          |     | <i>Case-control study</i> —Report numbers in each exposure category, or summary measures of exposure                                                                                                         | N/A         |
|                          |     | <i>Cross-sectional study</i> —Report numbers of outcome events or summary measures                                                                                                                           | N/A         |
| Main results             | 16  | (a) Give unadjusted estimates and, if applicable, confounder-adjusted estimates and their precision (eg, 95% confidence interval). Make clear which confounders were adjusted for and why they were included | 9-11, 17-18 |
|                          |     | (b) Report category boundaries when continuous variables were categorized                                                                                                                                    | 9           |
|                          |     | (c) If relevant, consider translating estimates of relative risk into absolute risk for a meaningful time period                                                                                             | N/A         |
| Other analyses           | 17  | Report other analyses done—eg analyses of subgroups and interactions, and sensitivity analyses                                                                                                               | 11-12       |
| <b>Discussion</b>        |     |                                                                                                                                                                                                              |             |
| Key results              | 18  | Summarise key results with reference to study objectives                                                                                                                                                     | 11          |
| Limitations              | 19  | Discuss limitations of the study, taking into account sources of potential bias or imprecision. Discuss both direction and magnitude of any potential bias                                                   | 11          |
| Interpretation           | 20  | Give a cautious overall interpretation of results considering objectives, limitations, multiplicity of analyses, results from similar studies, and other relevant evidence                                   | 11-13       |
| Generalisability         | 21  | Discuss the generalisability (external validity) of the study results                                                                                                                                        | 11          |
| <b>Other information</b> |     |                                                                                                                                                                                                              |             |
| Funding                  | 22  | Give the source of funding and the role of the funders for the present study and, if applicable, for the original study on which the present article is based                                                | 4           |

\*Give information separately for cases and controls in case-control studies and, if applicable, for exposed and unexposed groups in cohort and cross-sectional studies.

**Note:** An Explanation and Elaboration article discusses each checklist item and gives methodological background and published examples of transparent reporting. The STROBE checklist is best used in conjunction with this article (freely available on the Web sites of PLoS Medicine at <http://www.plosmedicine.org/>, Annals of Internal Medicine at <http://www.annals.org/>, and Epidemiology at <http://www.epidem.com/>). Information on the STROBE Initiative is available at [www.strobe-statement.org](http://www.strobe-statement.org).
