# Supplementary material for: Gender differences in bodyweight change following COVID-19 lockdown measures in the Netherlands: a prospective longitudinal study
Source: PubMed Central journal article supplement — BMJ Open. 2022 Apr 26;12(4):e054658. doi: 10.1136/bmjopen-2021-054658 (PMC10098263; doi:10.1136/bmjopen-2021-054658), 2022-04-26
Supplement: bmjopen-2021-054658supp001.pdf [file bmjopen-2021-054658supp001.pdf]

## Appendix A. Sample characteristics; stratified by gender and period of observation.

|                                                      | Women          |                |                |                |                | Men            |                |                |                |                |
|------------------------------------------------------|----------------|----------------|----------------|----------------|----------------|----------------|----------------|----------------|----------------|----------------|
|                                                      | 2016 and prior | 2017           | 2018           | 2019           | 2020           | 2016 and prior | 2017           | 2018           | 2019           | 2020           |
| Mean age <sup>a</sup><br>(Standard deviation)        | 44.4<br>(12.0) | 44.1<br>(12.6) | 44.3<br>(12.8) | 44.6<br>(12.6) | 45.4<br>(12.4) | 46.2<br>(11.7) | 46.5<br>(12.0) | 46.6<br>(12.3) | 47.5<br>(12.0) | 48.3<br>(11.9) |
| Lives with partner                                   | 79.2%          | 67.3%          | 64.8%          | 67.2%          | 68.4%          | 81.7%          | 71.1%          | 67.0%          | 68.9%          | 68.1%          |
| Primary activity status:                             |                |                |                |                |                |                |                |                |                |                |
| In paid employment                                   | 52.8%          | 63.6%          | 64.8%          | 65.2%          | 66.7%          | 76.9%          | 81.5%          | 79.5%          | 80.8%          | 79.2%          |
| Unemployed                                           | 2.7%           | 2.4%           | 1.8%           | 2.1%           | 2.7%           | 2.7%           | 3.3%           | 2.5%           | 2.5%           | 3.8%           |
| Student                                              | 7.6%           | 5.5%           | 6.7%           | 6.2%           | 4.4%           | 2.8%           | 3.8%           | 5.9%           | 4.5%           | 3.8%           |
| Homemaker                                            | 22.9%          | 13.0%          | 11.8%          | 12.2%          | 12.1%          | 1.2%           | 0.9%           | 1.0%           | 1.2%           | 1.7%           |
| Retired                                              | 4.5%           | 1.5%           | 1.3%           | 0.8%           | 1.2%           | 9.0%           | 2.3%           | 2.3%           | 2.7%           | 3.1%           |
| Disabled                                             | 3.7%           | 8.8%           | 9.1%           | 7.6%           | 8.2%           | 4.0%           | 5.2%           | 5.8%           | 5.6%           | 6.0%           |
| Other                                                | 5.9%           | 5.2%           | 4.5%           | 5.9%           | 4.7%           | 3.5%           | 3.0%           | 3.0%           | 2.7%           | 2.4%           |
| Mean bodyweight in kilograms<br>(Standard deviation) | 71.3<br>(14.5) | 74.8<br>(16.8) | 75.2<br>(17.5) | 74.9<br>(16.8) | 76.1<br>(17.6) | 83.7<br>(13.4) | 86.8<br>(14.7) | 86.5<br>(14.5) | 86.5<br>(15.2) | 86.9<br>(15.1) |
| Mean Body Mass Index (BMI)<br>(Standard deviation)   | 25.0<br>(4.6)  | 26.0<br>(5.5)  | 26.2<br>(5.8)  | 26.1<br>(5.5)  | 26.5<br>(5.7)  | 25.5<br>(3.6)  | 26.0<br>(4.0)  | 26.0<br>(4.0)  | 26.1<br>(4.1)  | 26.3<br>(4.1)  |
| BMI Category:                                        |                |                |                |                |                |                |                |                |                |                |
| Not overweight (< 25 kg/m <sup>2</sup> )             | 57.2%          | 49.2%          | 48.5%          | 49.7%          | 47.6%          | 49.7%          | 47.2%          | 46.9%          | 47.0%          | 45.2%          |
| Overweight (25-30 kg/m <sup>2</sup> )                | 29.6%          | 32.2%          | 31.5%          | 30.2%          | 29.5%          | 41.1%          | 38.1%          | 38.3%          | 37.7%          | 38.7%          |
| Obese (>= 30 kg/m <sup>2</sup> )                     | 13.1%          | 18.6%          | 20.1%          | 20.0%          | 22.9%          | 9.1%           | 14.7%          | 14.8%          | 15.4%          | 16.1%          |
| Number of observations                               | 16,336         | 805            | 714            | 845            | 768            | 18,830         | 769            | 709            | 808            | 746            |
| Number of observations with complete BMI information | 16,298         | 803            | 712            | 843            | 765            | 18,787         | 769            | 708            | 807            | 744            |

Notes: Data are from the DNB Household Survey 1993-2020;

<sup>a</sup> based on values before centring

## Appendix B. Results of fixed-effects analyses predicting bod mass index in women and men; coefficient estimates with 95% confidence intervals.

|                            | Women     |                 | Men       |                 | Women vs men |                 |
|----------------------------|-----------|-----------------|-----------|-----------------|--------------|-----------------|
|                            | b         | [95% CI]        | b         | [95% CI]        | $\Delta$ b   | [95% CI]        |
| Year:                      |           |                 |           |                 |              |                 |
| 2020 (Covid-year)          | Ref.      |                 | Ref.      |                 | Ref.         |                 |
| 2019 (pre-Covid year)      | -0.267*** | [-0.399,-0.134] | -0.049    | [-0.166,0.067]  | -0.217*      | [-0.394,-0.041] |
| 2018 (2 years pre-Covid)   | -0.310*** | [-0.481,-0.140] | -0.021    | [-0.153,0.112]  | -0.289**     | [-0.505,-0.073] |
| 2017 (3 years pre-Covid)   | -0.264**  | [-0.457,-0.072] | 0.060     | [-0.084,0.205]  | -0.325**     | [-0.565,-0.084] |
| 2016 and prior             | -0.331**  | [-0.557,-0.105] | 0.203*    | [0.031,0.375]   | -0.534***    | [-0.818,-0.250] |
| Time-variant controls:     |           |                 |           |                 |              |                 |
| Age <sup>a</sup>           | 0.093***  | [0.074,0.113]   | 0.108***  | [0.094,0.122]   | -0.015       | [-0.039,0.009]  |
| Age <sup>a</sup> (squared) | -0.001†   | [-0.002,0.000]  | -0.002*** | [-0.002,-0.001] | 0.001        | [-0.000,0.002]  |
| Lives with partner         | 0.350*    | [0.010,0.690]   | 0.139     | [-0.121,0.399]  | 0.211        | [-0.216,0.639]  |
| Primary activity status:   |           |                 |           |                 |              |                 |
| In paid employment         | Ref.      |                 | Ref.      |                 | Ref.         |                 |
| Unemployed                 | -0.044    | [-0.242,0.154]  | -0.083    | [-0.245,0.080]  | 0.038        | [-0.218,0.294]  |
| Student                    | 0.152     | [-0.043,0.346]  | -0.061    | [-0.345,0.224]  | 0.212        | [-0.132,0.556]  |
| Homemaker                  | 0.072     | [-0.097,0.241]  | -0.055    | [-0.472,0.362]  | 0.127        | [-0.323,0.577]  |
| Retired                    | 0.088     | [-0.128,0.304]  | -0.161†   | [-0.344,0.023]  | 0.249†       | [-0.035,0.532]  |
| Disabled                   | -0.064    | [-0.410,0.283]  | -0.114    | [-0.321,0.093]  | 0.050        | [-0.353,0.453]  |
| Other                      | 0.040     | [-0.159,0.239]  | -0.024    | [-0.182,0.134]  | 0.064        | [-0.191,0.318]  |
| Number of observations     | 19,416    |                 | 21,806    |                 |              |                 |
| Number of persons          | 4,357     |                 | 4,574     |                 |              |                 |

Notes: Data are from the DNB Household Survey 1993-2020; <sup>a</sup> centred on age 45;†  $p < .1$ , \*  $p < .05$ , \*\*  $p < .01$ , \*\*\*  $p < 0.001$

## Appendix C. Results of fixed-effects analyses predicting bodyweight change in women and men; coefficient estimates with 95% confidence intervals.

|                                                   | Women    |                 | Men       |                 | Women vs men |                 |
|---------------------------------------------------|----------|-----------------|-----------|-----------------|--------------|-----------------|
|                                                   | b        | [95% CI]        | b         | [95% CI]        | $\Delta$ b   | [95% CI]        |
| Year:                                             |          |                 |           |                 |              |                 |
| 2020 (Covid-year)                                 | Ref.     |                 | Ref.      |                 | Ref.         |                 |
| 2019 (pre-Covid year)                             | -0.760** | [-1.241,-0.280] | -0.131    | [-0.577,0.314]  | -0.629†      | [-1.285,0.026]  |
| 2018 (2 years pre-Covid)                          | -0.905** | [-1.558,-0.252] | -0.073    | [-0.573,0.428]  | -0.832*      | [-1.654,-0.010] |
| 2017 (3 years pre-Covid)                          | -0.781*  | [-1.463,-0.099] | 0.296     | [-0.276,0.869]  | -1.078*      | [-1.968,-0.187] |
| 2016 and prior                                    | -1.111*  | [-1.962,-0.261] | 0.935**   | [0.285,1.584]   | -2.046***    | [-3.116,-0.977] |
| Time-variant controls:                            |          |                 |           |                 |              |                 |
| Age <sup>a</sup>                                  | 0.259*** | [0.202,0.316]   | 0.362***  | [0.313,0.411]   | -0.103**     | [-0.178,-0.028] |
| Age <sup>a</sup> (squared)                        | -0.003*  | [-0.006,-0.001] | -0.007*** | [-0.010,-0.005] | 0.004†       | [-0.000,0.007]  |
| Lives with partner                                | 0.932†   | [-0.076,1.941]  | 0.487     | [-0.491,1.465]  | 0.445        | [-0.959,1.850]  |
| Not in paid employment                            | -0.166   | [-1.986,1.654]  | -0.063    | [-1.503,1.377]  | -0.103       | [-2.423,2.217]  |
| 2019 (pre-Covid year) x not in paid employment    | -0.091   | [-1.504,1.323]  | 0.931     | [-0.813,2.674]  | -1.022       | [-3.266,1.223]  |
| 2018 (2 years pre-Covid) x not in paid employment | 0.361    | [-1.505,2.228]  | 0.199     | [-1.100,1.498]  | 0.162        | [-2.111,2.436]  |
| 2017 (3 years pre-Covid) x not in paid employment | -0.010   | [-1.663,1.643]  | -0.312    | [-1.665,1.042]  | 0.302        | [-1.835,2.438]  |
| 2016 and prior x not in paid employment           | 0.183    | [-1.619,1.984]  | -0.417    | [-1.868,1.034]  | 0.600        | [-1.713,2.913]  |
| Number of observations                            | 19,468   |                 | 21,862    |                 |              |                 |
| Number of persons                                 | 4,365    |                 | 4,583     |                 |              |                 |

Notes: Data are from the DNB Household Survey 1993-2020; <sup>a</sup> centred on age 45;†  $p < .1$ , \*  $p < .05$ , \*\*  $p < .01$ , \*\*\*  $p < 0.001$
